# Supplementary material
Source: ML conference proceedings conference paper supplement (https://proceedings.mlr.press/v139/qiu21b.html)
Supplement: Supplementary file 1 [file qiu21b-supp.pdf]

## A. Omitted Algorithm for Player 2 in Section 3

---

### Algorithm 4 Optimistic Policy Optimization for Player 2 with Factored Independent Transition

---

- 1: **Initialize:** For all  $h \in [H]$ ,  $(s^1, s^2, a, b) \in \mathcal{S}_1 \times \mathcal{S}_2 \times \mathcal{A} \times \mathcal{B}$ :  $\mu_h^0(\cdot | s^1) = \mathbf{1}/|\mathcal{A}|$ ,  $\widehat{\mathcal{P}}_h^{1,0}(\cdot | s^1, a) = \mathbf{1}/|\mathcal{S}_1|$ ,  $\widehat{\mathcal{P}}_h^{2,0}(\cdot | s^2, b) = \mathbf{1}/|\mathcal{S}_2|$ ,  $\widehat{r}_h^0(\cdot, \cdot, \cdot) = \beta_h^0(\cdot, \cdot, \cdot) = \mathbf{0}$ .
  - 2: **for** episode  $k = 1, \dots, K$  **do**
  - 3:   Observe Player 1's policy  $\{\mu_h^{k-1}\}_{h=1}^H$ .
  - 4:   Start from state  $s_1 = (s_1^1, s_1^2)$ , set  $\overline{V}_{H+1}^{k-1}(\cdot) = \mathbf{0}$ .
  - 5:   **for** step  $h = H, H-1, \dots, 1$  **do**
  - 6:     Estimate the transition and reward function by  $\widehat{\mathcal{P}}_h^{k-1}(\cdot | \cdot, \cdot)$  and  $\widehat{r}_h^{k-1}(\cdot, \cdot, \cdot)$  as (11).
  - 7:     Update Q-function  $\forall (s, a, b) \in \mathcal{S} \times \mathcal{A} \times \mathcal{B}$ :
 
$$\underline{Q}_h^{k-1}(s, a, b) = \min\{(\widehat{r}_h^{k-1} + \widehat{\mathcal{P}}_h^{k-1} \underline{V}_{h+1}^{k-1} - \beta_h^{k-1})(s, a, b), H - h + 1\}^+.$$
  - 8:     Update value-function  $\forall s \in \mathcal{S}$ :
 
$$\underline{V}_h^{k-1}(s) = [\mu_h^{k-1}(\cdot | s)]^\top \underline{Q}_h^{k-1}(s, \cdot, \cdot) \nu_h^{k-1}(\cdot | s).$$
  - 9:   **end for**
  - 10:   Compute the empirical state reaching probability  $d_h^{\mu^k, \widehat{\mathcal{P}}^{1,k}}(s^2)$  of Player 1 under  $\mu^k, \widehat{\mathcal{P}}^{1,k}, \forall h \in [H]$ .
  - 11:   Update policy  $\nu_h^k(b | s^2)$  by solving (15),  $\forall (s^2, b, h)$ .
  - 12:   Take actions following  $b_h^k \sim \nu_h^k(\cdot | s_h^{2,k})$ ,  $\forall h \in [H]$ .
  - 13:   Observe the trajectory  $\{(s_h^k, a_h^k, b_h^k, s_{h+1}^k)\}_{h=1}^H$ , and rewards  $\{r_h^k(s_h^k, a_h^k, b_h^k)\}_{h=1}^H$ .
  - 14: **end for**
- 

Based on the empirical state reaching probability, the policy improvement step is associated with solving the following optimization problem

$$\max_{\mu} \sum_{h=1}^H [G_h^{k-1}(\nu_h) + \gamma^{-1} D_{\text{KL}}(\nu_h(\cdot | s^2), \nu_h^k(\cdot | s^2))], \quad (15)$$

where we define the linear function as  $\overline{G}_h^{k-1}(\mu_h) := \langle \nu_h(\cdot | s^2) - \nu_h^k(\cdot | s^2), \sum_{s^1 \in \mathcal{S}_1} F_h^{2,k}(s, \cdot) d_h^{\mu^k, \widehat{\mathcal{P}}^{1,k}}(s^1) \rangle_{\mathcal{B}}$  with  $F_h^{2,k}(s, b) = \langle \underline{Q}_h^k(s, \cdot, b), \mu_h^k(\cdot | s^1) \rangle_{\mathcal{A}}$ . Here (15) is a standard mirror descent step and admits a closed-form solution as  $\nu_h^k(b | s^2) = (\widetilde{Y}_h^{k-1})^{-1} \nu_h^{k-1}(b | s^2) \cdot \exp\{-\gamma \sum_{s^1 \in \mathcal{S}_1} F_h^{2,k}(s, b) d_h^{\mu^k, \widehat{\mathcal{P}}^{1,k}}(s^1) \rangle_{\mathcal{A}}\}$ , where  $\widetilde{Y}_h^{k-1}$  is a probability normalization term.

## B. Proofs for Section 3

**Lemma B.1.** *At the  $k$ -th episode, the difference between value functions  $V_1^{\mu^*, \nu^k}(s_1)$  and  $V_1^{\mu^k, \nu^k}(s_1)$  is*

$$\begin{aligned} & V_1^{\mu^*, \nu^k}(s_1) - V_1^{\mu^k, \nu^k}(s_1) \\ &= \overline{V}_1^k(s_1) - V_1^{\mu^k, \nu^k}(s_1) + \sum_{h=1}^H \mathbb{E}_{\mu^*, \mathcal{P}, \nu^k} \{ [\mu_h^*(\cdot | s_h^1)]^\top \overline{t}_h^k(s_h, \cdot, \cdot) \nu_h^k(\cdot | s_h) \mid s_1 \} \\ & \quad + \sum_{h=1}^H \mathbb{E}_{\mu^*, \mathcal{P}^1} \left\{ \left\langle \mu_h^*(\cdot | s_h^1) - \mu_h^k(\cdot | s_h^1), \sum_{s_h^2 \in \mathcal{S}_2} F_h^k(s_h^1, s_h^2, \cdot) d_h^{\nu^k, \widehat{\mathcal{P}}^{2,k}}(s_h^2) \right\rangle_{\mathcal{A}} \mid s_1^1, s_1^2 \right\} \\ & \quad + 2H \sum_{h=1}^H \sum_{s_h^2 \in \mathcal{S}_2} \left| q_h^{\nu^k, \mathcal{P}^2}(s_h^2) - d_h^{\nu^k, \widehat{\mathcal{P}}^{2,k}}(s_h^2) \right|, \end{aligned} \quad (16)$$

where  $s_h, a_h, b_h$  are random variables for state and actions,  $U_h^k(s, a) := \langle \overline{Q}_h^k(s, a, \cdot), \nu_h^k(\cdot | s) \rangle_{\mathcal{B}}$ , and we define the model prediction error of Q-function as

$$\overline{t}_h^k(s, a, b) = r_h(s, a, b) + \mathcal{P}_h \overline{V}_{h+1}^k(s, a, b) - \overline{Q}_h^k(s, a, b). \quad (17)$$

*Proof.* The proof of this lemma starts with decomposing the value function difference as

$$V_1^{\mu^*, \nu^k}(s_1) - V_1^{\mu^k, \nu^k}(s_1) = V_1^{\mu^*, \nu^k}(s_1) - \bar{V}_1^k(s_1) + \bar{V}_1^k(s_1) - V_1^{\mu^k, \nu^k}(s_1). \quad (18)$$

Here the term  $\bar{V}_1^k(s_1) - V_1^{\mu^k, \nu^k}(s_1)$  is the bias between the estimated value function  $\bar{V}_1^k(s_1)$  generated by Algorithm 1 and the value function  $V_1^{\mu^k, \nu^k}(s_1)$  under the true transition model  $\mathcal{P}$  at the  $k$ -th episode.

We first analyze the term  $V_1^{\mu^*, \nu^k}(s_1) - \bar{V}_1^k(s_1)$ . For any  $h$  and  $s$ , we consider to decompose the term  $V_h^{\mu^*, \nu^k}(s) - \bar{V}_h^k(s)$ , which gives

$$\begin{aligned} V_h^{\mu^*, \nu^k}(s) - \bar{V}_h^k(s) &= [\mu_h^*(\cdot|s)]^\top Q_h^{\mu^*, \nu^k}(s, \cdot, \cdot) \nu_h^k(\cdot|s) - [\mu_h^k(\cdot|s)]^\top \bar{Q}_h^k(s, \cdot, \cdot) \nu_h^k(\cdot|s) \\ &= [\mu_h^*(\cdot|s)]^\top Q_h^{\mu^*, \nu^k}(s, \cdot, \cdot) \nu_h^k(\cdot|s) - [\mu_h^*(\cdot|s)]^\top \bar{Q}_h^k(s, \cdot, \cdot) \nu_h^k(\cdot|s) \\ &\quad + [\mu_h^*(\cdot|s)]^\top \bar{Q}_h^k(s, \cdot, \cdot) \nu_h^k(\cdot|s) - [\mu_h^k(\cdot|s)]^\top \bar{Q}_h^k(s, \cdot, \cdot) \nu_h^k(\cdot|s) \\ &= [\mu_h^*(\cdot|s)]^\top [Q_h^{\mu^*, \nu^k}(s, \cdot, \cdot) - \bar{Q}_h^k(s, \cdot, \cdot)] \nu_h^k(\cdot|s) \\ &\quad + [\mu_h^*(\cdot|s) - \mu_h^k(\cdot|s)]^\top \bar{Q}_h^k(s, \cdot, \cdot) \nu_h^k(\cdot|s), \end{aligned} \quad (19)$$

where the first inequality is by the definition of  $V_h^{\mu^*, \nu^k}$  in (1) and the definition of  $\bar{V}_h^k$  in Line 1 of Algorithm 1. In addition, by the definition of  $Q_h^{\mu^*, \nu^k}(s, \cdot, \cdot)$  in (2) and the definition of the model prediction error  $\bar{t}_h^k$  for Player one in (36), we have

$$\begin{aligned} &[\mu_h^*(\cdot|s)]^\top [Q_h^{\mu^*, \nu^k}(s, \cdot, \cdot) - \bar{Q}_h^k(s, \cdot, \cdot)] \nu_h^k(\cdot|s) \\ &= \sum_{a \in \mathcal{A}} \sum_{b \in \mathcal{B}} \mu_h^*(a|s) \left[ \sum_{s' \in \mathcal{S}} \mathcal{P}_h(s'|s, a, b) [V_{h+1}^{\mu^*, \nu^k}(s') - \bar{V}_{h+1}^k(s')] + \bar{t}_h^k(s, a, b) \right] \nu_h^k(b|s) \\ &= \sum_{a \in \mathcal{A}} \sum_{b \in \mathcal{B}} \mu_h^*(a|s) \left[ \sum_{s' \in \mathcal{S}} \mathcal{P}_h(s'|s, a, b) [V_{h+1}^{\mu^*, \nu^k}(s') - \bar{V}_{h+1}^k(s')] \right] \nu_h^k(b|s) + \sum_{a \in \mathcal{A}} \sum_{b \in \mathcal{B}} \mu_h^*(a|s) \bar{t}_h^k(s, a, b) \nu_h^k(b|s). \end{aligned}$$

Combining this equality with (19) gives

$$\begin{aligned} V_h^{\mu^*, \nu^k}(s) - \bar{V}_h^k(s) &= \sum_{a \in \mathcal{A}} \sum_{b \in \mathcal{B}} \mu_h^*(a|s) \left[ \sum_{s' \in \mathcal{S}} \mathcal{P}_h(s'|s, a, b) [V_{h+1}^{\mu^*, \nu^k}(s') - \bar{V}_{h+1}^k(s')] \right] \nu_h^k(b|s) \\ &\quad + \sum_{a \in \mathcal{A}} \sum_{b \in \mathcal{B}} \mu_h^*(a|s) \bar{t}_h^k(s, a, b) \nu_h^k(b|s) \\ &\quad + \sum_{a \in \mathcal{A}} \sum_{b \in \mathcal{B}} [\mu_h^*(a|s) - \mu_h^k(a|s)] \bar{Q}_h^k(s, a, b) \nu_h^k(b|s). \end{aligned} \quad (20)$$

The inequality (20) indicates a recursion of the value function difference  $V_h^{\mu^*, \nu^k}(s) - \bar{V}_h^k(s)$ . As we have defined  $V_{H+1}^{\mu^*, \nu^k}(s) = 0$  and  $\bar{V}_{H+1}^k(s) = 0$ , by recursively applying (20) from  $h = 1$  to  $H$ , we obtain

$$\begin{aligned} V_1^{\mu^*, \nu^k}(s_1) - \bar{V}_1^k(s_1) &= \sum_{h=1}^H \mathbb{E}_{\mu^*, \mathcal{P}, \nu^k} \{ [\mu_h^*(\cdot|s_h)]^\top \bar{t}_h^k(s_h, \cdot, \cdot) \nu_h^k(\cdot|s_h) \mid s_1 \} \\ &\quad + \underbrace{\sum_{h=1}^H \mathbb{E}_{\mu^*, \mathcal{P}, \nu^k} \{ [\mu_h^*(\cdot|s_h) - \mu_h^k(\cdot|s_h)]^\top \bar{Q}_h^k(s_h, \cdot, \cdot) \nu_h^k(\cdot|s_h) \mid s_1 \}}_{\text{Term(I)}}, \end{aligned} \quad (21)$$

where  $s_h$  are a random variables denoting the state at the  $h$ -th step following a distribution determined jointly by  $\mu^*$ ,  $\mathcal{P}$ ,  $\nu^k$ . Note that we have the factored independent transition model structure  $\mathcal{P}_h(s'|s, a, b) = \mathcal{P}_h^1(s^1|s^1, a) \mathcal{P}_h^2(s^2|s^2, b)$  with

$s = (s^1, s^2)$  and  $s' = (s^{1'}, s^{2'})$ , and  $\mu_h(a|s) = \mu_h(a|s^1)$  as well as  $\nu_h(b|s) = \nu_h(b|s^2)$ . Here we also have the state reaching probability  $q^{\nu^k, \mathcal{P}^2}(s^2) = \{q_h^{\nu^k, \mathcal{P}^2}(s^2)\}_{h=1}^H$  under  $\mu^k$  and true transition  $\mathcal{P}^2$  for Player 2, and define the empirical reaching probability  $d^{\nu^k, \widehat{\mathcal{P}}^{2,k}}(s^2) = \{d_h^{\nu^k, \widehat{\mathcal{P}}^{2,k}}(s^2)\}_{h=1}^H$  under the empirical transition model  $\widehat{\mathcal{P}}^{2,k}$  for Player 2, where we let  $\widehat{\mathcal{P}}_h^k(s'|s, a, b) = \widehat{\mathcal{P}}_h^{1,k}(s^{1'}|s^1, a)\widehat{\mathcal{P}}_h^{2,k}(s^{2'}|s^2, b)$ . Then, for Term(I), we have

$$\begin{aligned}
 \text{Term(I)} &= \sum_{h=1}^H \mathbb{E}_{\mu^*, \mathcal{P}, \nu^k} \{ [\mu_h^*(\cdot|s_h) - \mu_h^k(\cdot|s_h)]^\top \overline{Q}_h^k(s_h, \cdot, \cdot) \nu_h^k(\cdot|s_h) \mid s_1 \} \\
 &= \sum_{h=1}^H \mathbb{E}_{\mu^*, \mathcal{P}^1, \mathcal{P}^2, \nu^k} \{ [\mu_h^*(\cdot|s_h^1) - \mu_h^k(\cdot|s_h^1)]^\top \overline{Q}_h^k(s_h^1, s_h^2, \cdot, \cdot) \nu_h^k(\cdot|s_h^2) \mid s_1^1, s_1^2 \} \\
 &= \sum_{h=1}^H \mathbb{E}_{\mu^*, \mathcal{P}^1} \{ [\mu_h^*(\cdot|s_h^1) - \mu_h^k(\cdot|s_h^1)]^\top \sum_{s_h^2 \in \mathcal{S}_2} \overline{Q}_h^k(s_h^1, s_h^2, \cdot, \cdot) \nu_h^k(\cdot|s_h^2) q_h^{\nu^k, \mathcal{P}^2}(s_h^2) \mid s_1^1, s_1^2 \}.
 \end{aligned} \tag{22}$$

The last term of the above inequality (22) can be further bounded as

$$\begin{aligned}
 &\sum_{h=1}^H \mathbb{E}_{\mu^*, \mathcal{P}^1} \{ [\mu_h^*(\cdot|s_h^1) - \mu_h^k(\cdot|s_h^1)]^\top \sum_{s_h^2 \in \mathcal{S}_2} \overline{Q}_h^k(s_h^1, s_h^2, \cdot, \cdot) \nu_h^k(\cdot|s_h^2) q_h^{\nu^k, \mathcal{P}^2}(s_h^2) \mid s_1^1, s_1^2 \} \\
 &= \sum_{h=1}^H \mathbb{E}_{\mu^*, \mathcal{P}^1} \{ [\mu_h^*(\cdot|s_h^1) - \mu_h^k(\cdot|s_h^1)]^\top \sum_{s_h^2 \in \mathcal{S}_2} \overline{Q}_h^k(s_h^1, s_h^2, \cdot, \cdot) \nu_h^k(\cdot|s_h^2) d_h^{\nu^k, \widehat{\mathcal{P}}^{2,k}}(s_h^2) \mid s_1^1, s_1^2 \} \\
 &\quad + \sum_{h=1}^H \mathbb{E}_{\mu^*, \mathcal{P}^1} \{ [\mu_h^*(\cdot|s_h^1) - \mu_h^k(\cdot|s_h^1)]^\top \sum_{s_h^2 \in \mathcal{S}_2} \overline{Q}_h^k(s_h^1, s_h^2, \cdot, \cdot) \nu_h^k(\cdot|s_h^2) [q_h^{\nu^k, \mathcal{P}^2}(s_h^2) - d_h^{\nu^k, \widehat{\mathcal{P}}^{2,k}}(s_h^2)] \mid s_1^1, s_1^2 \} \\
 &\leq \sum_{h=1}^H \mathbb{E}_{\mu^*, \mathcal{P}^1} \{ [\mu_h^*(\cdot|s_h^1) - \mu_h^k(\cdot|s_h^1)]^\top \sum_{s_h^2 \in \mathcal{S}_2} \overline{Q}_h^k(s_h^1, s_h^2, \cdot, \cdot) \nu_h^k(\cdot|s_h^2) d_h^{\nu^k, \widehat{\mathcal{P}}^{2,k}}(s_h^2) \mid s_1^1, s_1^2 \} \\
 &\quad + 2H \sum_{h=1}^H \sum_{s_h^2 \in \mathcal{S}_2} \left| q_h^{\nu^k, \mathcal{P}^2}(s_h^2) - d_h^{\nu^k, \widehat{\mathcal{P}}^{2,k}}(s_h^2) \right|,
 \end{aligned}$$

where the factor  $H$  in the last term is due to  $|\overline{Q}_h^k(s_h^1, s_h^2, \cdot, \cdot)| \leq H$ . Combining the above inequality with (22), we have

$$\begin{aligned}
 \text{Term(I)} &\leq \sum_{h=1}^H \mathbb{E}_{\mu^*, \mathcal{P}^1} \{ [\mu_h^*(\cdot|s_h^1) - \mu_h^k(\cdot|s_h^1)]^\top \sum_{s_h^2 \in \mathcal{S}_2} \overline{Q}_h^k(s_h^1, s_h^2, \cdot, \cdot) \nu_h^k(\cdot|s_h^2) d_h^{\nu^k, \widehat{\mathcal{P}}^{2,k}}(s_h^2) \mid s_1^1, s_1^2 \} \\
 &\quad + 2H \sum_{h=1}^H \sum_{s_h^2 \in \mathcal{S}_2} \left| q_h^{\nu^k, \mathcal{P}^2}(s_h^2) - d_h^{\nu^k, \widehat{\mathcal{P}}^{2,k}}(s_h^2) \right|.
 \end{aligned} \tag{23}$$

Further combining (23) with (18), we eventually have

$$\begin{aligned}
 &V_1^{\mu^*, \nu^k}(s_1) - V_1^{\mu^k, \nu^k}(s_1) \\
 &\leq \overline{V}_1^k(s_1) - V_1^{\mu^k, \nu^k}(s_1) + \sum_{h=1}^H \mathbb{E}_{\mu^*, \mathcal{P}, \nu^k} \{ [\mu_h^*(\cdot|s_h)]^\top \overline{t}_h^k(s_h, \cdot, \cdot) \nu_h^k(\cdot|s_h) \mid s_1 \} \\
 &\quad + \sum_{h=1}^H \mathbb{E}_{\mu^*, \mathcal{P}^1} \left\{ \left\langle \mu_h^*(\cdot|s_h^1) - \mu_h^k(\cdot|s_h^1), \sum_{s_h^2 \in \mathcal{S}_2} F_h^k(s_h^1, s_h^2, \cdot) d_h^{\nu^k, \widehat{\mathcal{P}}^{2,k}}(s_h^2) \right\rangle_{\mathcal{A}} \mid s_1^1, s_1^2 \right\} \\
 &\quad + 2H \sum_{h=1}^H \sum_{s_h^2 \in \mathcal{S}_2} \left| q_h^{\nu^k, \mathcal{P}^2}(s_h^2) - d_h^{\nu^k, \widehat{\mathcal{P}}^{2,k}}(s_h^2) \right|,
 \end{aligned}$$

where we denote  $F_h^{1,k}(s_h^1, s_h^2, a) := \langle \bar{Q}_h^k(s_h^1, s_h^2, a, \cdot), \nu_h^k(\cdot | s_h^2) \rangle_{\mathcal{B}}$  for any  $a \in \mathcal{A}$ . This completes our proof.  $\square$

**Lemma B.2.** *With setting  $\eta = \sqrt{\log |\mathcal{A}| / (KH^2)}$ , the mirror ascent steps of Algorithm 1 lead to*

$$\sum_{k=1}^K \sum_{h=1}^H \mathbb{E}_{\mu^*, \mathcal{P}^1} \left\langle \left\langle \mu_h^*(\cdot | s_h^1) - \mu_h^k(\cdot | s_h^1), \sum_{s_h^2 \in \mathcal{S}_2} F_h^k(s_h^1, s_h^2, \cdot) d_h^{\nu^k, \hat{\mathcal{P}}^{2,k}}(s_h^2) \right\rangle_{\mathcal{A}} \middle| s_1^1, s_1^2 \right\rangle \leq \mathcal{O} \left( \sqrt{H^4 K \log |\mathcal{A}|} \right).$$

*Proof.* As shown in (10), the mirror ascent step at the  $k$ -th episode is to solve the following maximization problem

$$\underset{\mu \in \Delta(\mathcal{A} | \mathcal{S}_1, H)}{\text{maximize}} \sum_{h=1}^H \left\langle \mu_h(\cdot | s^1) - \mu_h^k(\cdot | s^1), \sum_{s^2 \in \mathcal{S}_2} F_h^k(s^1, s^2, \cdot) d_h^{\nu^k, \hat{\mathcal{P}}^{2,k}}(s^2) \right\rangle_{\mathcal{A}} - \frac{1}{\eta} \sum_{h=1}^H D_{\text{KL}}(\mu_h(\cdot | s^1), \mu_h^k(\cdot | s^1)),$$

with  $F_h^{1,k}(s^1, s^2, a) := \langle \bar{Q}_h^k(s^1, s^2, a, \cdot), \nu_h^k(\cdot | s^2) \rangle_{\mathcal{B}}$ . We equivalently rewrite this maximization problem to a minimization problem as

$$\underset{\mu \in \Delta(\mathcal{A} | \mathcal{S}_1, H)}{\text{minimize}} - \sum_{h=1}^H \left\langle \mu_h(\cdot | s^1) - \mu_h^k(\cdot | s^1), \sum_{s^2 \in \mathcal{S}_2} F_h^k(s^1, s^2, \cdot) d_h^{\nu^k, \hat{\mathcal{P}}^{2,k}}(s^2) \right\rangle_{\mathcal{A}} + \frac{1}{\eta} \sum_{h=1}^H D_{\text{KL}}(\mu_h(\cdot | s^1), \mu_h^k(\cdot | s^1)).$$

Note that the closed-form solution  $\mu_h^{k+1}$  to this minimization problem is guaranteed to stay in the relative interior of its feasible set  $\Delta(\mathcal{A} | \mathcal{S}_1, H)$  if initializing  $\mu_h^0(\cdot | s^1) = \mathbf{1}/|\mathcal{A}|$ . Thus, we apply Lemma C.12 and obtain that for any  $\mu = \{\mu_h\}_{h=1}^H$ , the following inequality holds

$$\begin{aligned} & -\eta \left\langle \mu_h^{k+1}(\cdot | s^1), \sum_{s^2 \in \mathcal{S}_2} F_h^k(s^1, s^2, \cdot) d_h^{\nu^k, \hat{\mathcal{P}}^{2,k}}(s^2) \right\rangle_{\mathcal{A}} + \eta \left\langle \mu_h(\cdot | s^1), \sum_{s^2 \in \mathcal{S}_2} F_h^k(s^1, s^2, \cdot) d_h^{\nu^k, \hat{\mathcal{P}}^{2,k}}(s^2) \right\rangle_{\mathcal{A}} \\ & \leq D_{\text{KL}}(\mu_h(\cdot | s^1), \mu_h^k(\cdot | s^1)) - D_{\text{KL}}(\mu_h(\cdot | s^1), \mu_h^{k+1}(\cdot | s^1)) - D_{\text{KL}}(\mu_h^{k+1}(\cdot | s^1), \mu_h^k(\cdot | s^1)). \end{aligned}$$

Then, by rearranging the terms and letting  $\mu_h = \mu_h^*$ , we have

$$\begin{aligned} & \eta \left\langle \mu_h^*(\cdot | s^1) - \mu_h^k(\cdot | s^1), \sum_{s^2 \in \mathcal{S}_2} F_h^k(s^1, s^2, \cdot) d_h^{\nu^k, \hat{\mathcal{P}}^{2,k}}(s^2) \right\rangle_{\mathcal{A}} \\ & \leq D_{\text{KL}}(\mu_h^*(\cdot | s^1), \mu_h^k(\cdot | s^1)) - D_{\text{KL}}(\mu_h^*(\cdot | s^1), \mu_h^{k+1}(\cdot | s^1)) - D_{\text{KL}}(\mu_h^{k+1}(\cdot | s^1), \mu_h^k(\cdot | s^1)) \\ & \quad + \eta \left\langle \mu_h^{k+1}(\cdot | s^1) - \mu_h^k(\cdot | s^1), \sum_{s^2 \in \mathcal{S}_2} F_h^k(s^1, s^2, \cdot) d_h^{\nu^k, \hat{\mathcal{P}}^{2,k}}(s^2) \right\rangle_{\mathcal{A}}. \end{aligned} \tag{24}$$

Due to Pinsker's inequality, we have

$$-D_{\text{KL}}(\mu_h^{k+1}(\cdot | s^1), \mu_h^k(\cdot | s^1)) \leq -\frac{1}{2} \|\mu_h^{k+1}(\cdot | s^1) - \mu_h^k(\cdot | s^1)\|_1^2.$$

Further by Cauchy-Schwarz inequality, we have

$$\eta \left\langle \mu_h^{k+1}(\cdot | s^1) - \mu_h^k(\cdot | s^1), \sum_{s^2 \in \mathcal{S}_2} F_h^k(s^1, s^2, \cdot) d_h^{\nu^k, \hat{\mathcal{P}}^{2,k}}(s^2) \right\rangle_{\mathcal{A}} \leq \eta H \|\mu_h^{k+1}(\cdot | s^1) - \mu_h^k(\cdot | s^1)\|_1,$$

since we have

$$\begin{aligned} & \left\| \sum_{s^2 \in \mathcal{S}_2} F_h^k(s^1, s^2, \cdot) d_h^{\nu^k, \hat{\mathcal{P}}^{2,k}}(s^2) \right\|_{\infty} \\ & = \max_{a \in \mathcal{A}} \sum_{s^2 \in \mathcal{S}_2} F_h^k(s^1, s^2, a) d_h^{\nu^k, \hat{\mathcal{P}}^{2,k}}(s^2) \\ & = \max_{a \in \mathcal{A}} \sum_{s^2 \in \mathcal{S}_2} \langle \bar{Q}_h^k(s^1, s^2, a, \cdot), \nu_h^k(\cdot | s^2) \rangle_{\mathcal{B}} \cdot d_h^{\nu^k, \hat{\mathcal{P}}^{2,k}}(s^2) \\ & \leq \sum_{s^2 \in \mathcal{S}_2} H \cdot d_h^{\nu^k, \hat{\mathcal{P}}^{2,k}}(s^2) = H. \end{aligned}$$

Thus, we further obtain

$$\begin{aligned}
 & -D_{\text{KL}}(\mu_h^{k+1}(\cdot|s^1), \mu_h^k(\cdot|s^1)) + \eta \langle \mu_h^{k+1}(\cdot|s^1) - \mu_h^k(\cdot|s^1), \sum_{s_h^2 \in \mathcal{S}_2} F_h^k(s^1, s^2, \cdot) d_h^{\nu^k, \widehat{\mathcal{P}}^{2,k}}(s^2) \rangle_{\mathcal{A}} \\
 & \leq -\frac{1}{2} \|\mu_h^{k+1}(\cdot|s^1) - \mu_h^k(\cdot|s^1)\|_1^2 + \eta H \|\mu_h^{k+1}(\cdot|s^1) - \mu_h^k(\cdot|s^1)\|_1 \\
 & \leq \frac{1}{2} \eta^2 H^2,
 \end{aligned} \tag{25}$$

where the last inequality is by viewing  $\|\mu_h^{k+1}(\cdot|s^1) - \mu_h^k(\cdot|s^1)\|_1$  as a variable  $x$  and finding the maximal value of  $-1/2 \cdot x^2 + \eta H x$  to obtain the upper bound  $1/2 \cdot \eta^2 H^2$ .

Thus, combing (25) with (24), the policy improvement step in Algorithm 1 implies

$$\begin{aligned}
 & \eta \langle \mu_h^*(\cdot|s^1) - \mu_h^k(\cdot|s^1), \sum_{s^2 \in \mathcal{S}_2} F_h^k(s^1, s^2, \cdot) d_h^{\nu^k, \widehat{\mathcal{P}}^{2,k}}(s^2) \rangle_{\mathcal{A}} \\
 & \leq D_{\text{KL}}(\mu_h^*(\cdot|s^1), \mu_h^k(\cdot|s^1)) - D_{\text{KL}}(\mu_h^*(\cdot|s^1), \mu_h^{k+1}(\cdot|s^1)) + \frac{1}{2} \eta^2 H^2,
 \end{aligned}$$

which further leads to

$$\begin{aligned}
 & \sum_{h=1}^H \mathbb{E}_{\mu^*, \mathcal{P}^1} \left\{ \left\langle \mu_h^*(\cdot|s_h^1) - \mu_h^k(\cdot|s_h^1), \sum_{s_h^2 \in \mathcal{S}_2} F_h^k(s_h^1, s_h^2, \cdot) d_h^{\nu^k, \widehat{\mathcal{P}}^{2,k}}(s_h^2) \right\rangle_{\mathcal{A}} \middle| s_1^1, s_1^2 \right\} \\
 & \leq \frac{1}{\eta} \sum_{h=1}^H \mathbb{E}_{\mu^*, \mathcal{P}^1} [D_{\text{KL}}(\mu_h^*(\cdot|s_h^1), \mu_h^k(\cdot|s_h^1)) - D_{\text{KL}}(\mu_h^*(\cdot|s_h^1), \mu_h^{k+1}(\cdot|s_h^1))] + \frac{1}{2} \eta H^3.
 \end{aligned}$$

Taking summation from  $k = 1$  to  $K$  of both sides, we obtain

$$\begin{aligned}
 & \sum_{k=1}^K \sum_{h=1}^H \mathbb{E}_{\mu^*, \mathcal{P}^1} \left\{ \left\langle \mu_h^*(\cdot|s_h^1) - \mu_h^k(\cdot|s_h^1), \sum_{s_h^2 \in \mathcal{S}_2} F_h^k(s_h^1, s_h^2, \cdot) d_h^{\nu^k, \widehat{\mathcal{P}}^{2,k}}(s_h^2) \right\rangle_{\mathcal{A}} \middle| s_1^1, s_1^2 \right\} \\
 & \leq \frac{1}{\eta} \sum_{h=1}^H \mathbb{E}_{\mu^*, \mathcal{P}^1} [D_{\text{KL}}(\mu_h^*(\cdot|s_h^1), \mu_h^1(\cdot|s_h^1)) - D_{\text{KL}}(\mu_h^*(\cdot|s_h^1), \mu_h^{K+1}(\cdot|s_h^1))] + \frac{1}{2} \eta K H^3 \\
 & \leq \frac{1}{\eta} \sum_{h=1}^H \mathbb{E}_{\mu^*, \mathcal{P}^1} [D_{\text{KL}}(\mu_h^*(\cdot|s_h^1), \mu_h^1(\cdot|s_h^1))] + \frac{1}{2} \eta K H^3,
 \end{aligned}$$

where the last inequality is by non-negativity of KL divergence. With the initialization in Algorithm 1, it is guaranteed that  $\mu_h^1(\cdot|s^1) = \mathbf{1}/|\mathcal{A}|$ , which thus leads to  $D_{\text{KL}}(\mu_h^*(\cdot|s^1), \mu_h^1(\cdot|s^1)) \leq \log |\mathcal{A}|$  for any  $s^1$ . Then, with setting  $\eta = \sqrt{\log |\mathcal{A}| / (K H^2)}$ , we bound the last term as

$$\frac{1}{\eta} \sum_{h=1}^H \mathbb{E}_{\mu^*, \mathcal{P}^1} [D_{\text{KL}}(\mu_h^*(\cdot|s_h^1), \mu_h^1(\cdot|s_h^1))] + \frac{1}{2} \eta K H^3 \leq \mathcal{O} \left( \sqrt{H^4 K \log |\mathcal{A}|} \right),$$

which gives

$$\sum_{k=1}^K \sum_{h=1}^H \mathbb{E}_{\mu^*, \mathcal{P}^1} \left\{ \left\langle \mu_h^*(\cdot|s_h^1) - \mu_h^k(\cdot|s_h^1), \sum_{s_h^2 \in \mathcal{S}_2} F_h^k(s_h^1, s_h^2, \cdot) d_h^{\nu^k, \widehat{\mathcal{P}}^{2,k}}(s_h^2) \right\rangle_{\mathcal{A}} \middle| s_1^1, s_1^2 \right\} \leq \mathcal{O} \left( \sqrt{H^4 K \log |\mathcal{A}|} \right).$$

This completes the proof.  $\square$

**Lemma B.3.** For any  $k \in [K]$ ,  $h \in [H]$  and all  $(s, a, b) \in \mathcal{S} \times \mathcal{A} \times \mathcal{B}$ , with probability at least  $1 - \delta$ , we have

$$|\widehat{r}_h^k(s, a, b) - r_h(s, a, b)| \leq \sqrt{\frac{4 \log(|\mathcal{S}||\mathcal{A}||\mathcal{B}|HK/\delta)}{\max\{N_h^k(s, a, b), 1\}}}.$$

*Proof.* The proof for this theorem is a direct application of Hoeffding's inequality. For  $k \geq 1$ , the definition of  $\widehat{r}_h^k$  in (11) indicates that  $\widehat{r}_h^k(s, a, b)$  is the average of  $N_h^k(s, a, b)$  samples of the observed rewards at  $(s, a, b)$  if  $N_h^k(s, a, b) > 0$ . Then, for fixed  $k \in [K]$ ,  $h \in [H]$  and state-action tuple  $(s, a, b) \in \mathcal{S} \times \mathcal{A} \times \mathcal{B}$ , when  $N_h^k(s, a, b) > 0$ , according to Hoeffding's inequality, with probability at least  $1 - \delta'$  where  $\delta' \in (0, 1]$ , we have

$$|\widehat{r}_h^k(s, a, b) - r_h(s, a, b)| \leq \sqrt{\frac{\log(2/\delta')}{2N_h^k(s, a, b)}},$$

where we also use the facts that the observed rewards  $r_h^k \in [0, 1]$  for all  $k$  and  $h$ , and  $\mathbb{E}[\widehat{r}_h^k] = r_h$  for all  $k$  and  $h$ . For the case where  $N_h^k(s, a, b) = 0$ , by (11), we know  $\widehat{r}_h^k(s, a, b) = 0$  such that  $|\widehat{r}_h^k(s, a, b) - r_h(s, a, b)| = |r_h(s, a, b)| \leq 1$ . On the other hand, we have  $\sqrt{2 \log(2/\delta')} \geq 1 > |\widehat{r}_h^k(s, a, b) - r_h(s, a, b)|$ . Thus, combining the above results, with probability at least  $1 - \delta'$ , for fixed  $k \in [K]$ ,  $h \in [H]$  and state-action tuple  $(s, a, b) \in \mathcal{S} \times \mathcal{A} \times \mathcal{B}$ , we have

$$|\widehat{r}_h^k(s, a, b) - r_h(s, a, b)| \leq \sqrt{\frac{2 \log(2/\delta')}{\max\{N_h^k(s, a, b), 1\}}}.$$

Moreover, by the union bound, letting  $\delta = |\mathcal{S}||\mathcal{A}||\mathcal{B}|HK\delta'/2$ , assuming  $K > 1$ , with probability at least  $1 - \delta$ , for any  $k \in [K]$ ,  $h \in [H]$  and any state-action tuple  $(s, a, b) \in \mathcal{S} \times \mathcal{A} \times \mathcal{B}$ , we have

$$|\widehat{r}_h^k(s, a, b) - r_h(s, a, b)| \leq \sqrt{\frac{4 \log(|\mathcal{S}||\mathcal{A}||\mathcal{B}|HK/\delta)}{\max\{N_h^k(s, a, b), 1\}}}.$$

This completes the proof.  $\square$

In (9), we actually factor the state as  $s = (s^1, s^2)$  such that we have  $|\mathcal{S}| = |\mathcal{S}_1||\mathcal{S}_2|$ . Thus, we set  $\beta_h^{r,k}(s, a, b) = \sqrt{\frac{4 \log(|\mathcal{S}||\mathcal{A}||\mathcal{B}|HK/\delta)}{\max\{N_h^k(s, a, b), 1\}}} = \sqrt{\frac{4 \log(|\mathcal{S}_1||\mathcal{S}_2||\mathcal{A}||\mathcal{B}|HK/\delta)}{\max\{N_h^k(s^1, s^2, a, b), 1\}}}$ , which equals the bound in Lemma B.3. The counter  $N_h^k(s, a, b)$  is equivalent to  $N_h^k(s^1, s^2, a, b)$ .

**Lemma B.4.** For any  $k \in [K]$ ,  $h \in [H]$  and all  $(s, a) \in \mathcal{S} \times \mathcal{A}$ , with probability at least  $1 - \delta$ , we have

$$\left\| \widehat{\mathcal{P}}_h^k(\cdot | s, a, b) - \mathcal{P}_h(\cdot | s, a, b) \right\|_1 \leq \sqrt{\frac{2|\mathcal{S}| \log(|\mathcal{S}||\mathcal{A}|HK/\delta)}{\max\{N_h^k(s, a), 1\}}},$$

where we have a factored state space  $s = (s^1, s^2)$ ,  $s' = (s^{1'}, s^{2'})$ , and an independent state transition  $\mathcal{P}_h(s' | s, a, b) = \mathcal{P}_h^1(s^{1'} | s^1, a) \mathcal{P}_h^2(s^{2'} | s^2, b)$  and  $\widehat{\mathcal{P}}_h^k(\cdot | s, a, b) = \widehat{\mathcal{P}}_h^{1,k}(s^{1'} | s^1, a) \widehat{\mathcal{P}}_h^{2,k}(s^{2'} | s^2, b)$ .

*Proof.* Since the state space and the transition model are factored, we need to decompose the term as follows

$$\begin{aligned} & \left\| \widehat{\mathcal{P}}_h^k(\cdot | s, a, b) - \mathcal{P}_h(\cdot | s, a, b) \right\|_1 \\ &= \sum_{s^{1'}, s^{2'}} \left| \widehat{\mathcal{P}}_h^{1,k}(s^{1'} | s^1, a) \widehat{\mathcal{P}}_h^{2,k}(s^{2'} | s^2, b) - \mathcal{P}_h^1(s^{1'} | s^1, a) \mathcal{P}_h^2(s^{2'} | s^2, b) \right| \\ &= \sum_{s^{1'}, s^{2'}} \left| \left[ \widehat{\mathcal{P}}_h^{1,k}(s^{1'} | s^1, a) - \mathcal{P}_h^1(s^{1'} | s^1, a) \right] \widehat{\mathcal{P}}_h^{2,k}(s^{2'} | s^2, b) + \mathcal{P}_h^1(s^{1'} | s^1, a) \left[ \widehat{\mathcal{P}}_h^{2,k}(s^{2'} | s^2, b) - \mathcal{P}_h^2(s^{2'} | s^2, b) \right] \right| \\ &\leq \sum_{s^{1'}, s^{2'}} \left\{ \left| \widehat{\mathcal{P}}_h^{1,k}(s^{1'} | s^1, a) - \mathcal{P}_h^1(s^{1'} | s^1, a) \right| \widehat{\mathcal{P}}_h^{2,k}(s^{2'} | s^2, b) + \mathcal{P}_h^1(s^{1'} | s^1, a) \left| \widehat{\mathcal{P}}_h^{2,k}(s^{2'} | s^2, b) - \mathcal{P}_h^2(s^{2'} | s^2, b) \right| \right\} \\ &\leq \sum_{s^{1'}} \left| \widehat{\mathcal{P}}_h^{1,k}(s^{1'} | s^1, a) - \mathcal{P}_h^1(s^{1'} | s^1, a) \right| + \sum_{s^{2'}} \left| \widehat{\mathcal{P}}_h^{2,k}(s^{2'} | s^2, b) - \mathcal{P}_h^2(s^{2'} | s^2, b) \right| \\ &= \left\| \widehat{\mathcal{P}}_h^{1,k}(\cdot | s^1, a) - \mathcal{P}_h^1(\cdot | s^1, a) \right\|_1 + \left\| \widehat{\mathcal{P}}_h^{2,k}(\cdot | s^2, b) - \mathcal{P}_h^2(\cdot | s^2, b) \right\|_1 \end{aligned}$$

where the last inequality is due to  $\sum_{s^{2'}} \widehat{\mathcal{P}}_h^{2,k}(s^{2'} | s^2, b) = 1$  and  $\sum_{s^{1'}} \mathcal{P}_h^1(s^{1'} | s^1, a) = 1$ . Thus, we need to bound the two terms  $\left\| \widehat{\mathcal{P}}_h^{1,k}(\cdot | s^1, a) - \mathcal{P}_h^1(\cdot | s^1, a) \right\|_1$  and  $\left\| \widehat{\mathcal{P}}_h^{2,k}(\cdot | s^2, b) - \mathcal{P}_h^2(\cdot | s^2, b) \right\|_1$  separately.

For  $k \geq 1$ , we have  $\|\widehat{\mathcal{P}}_h^{1,k}(\cdot | s^1, a) - \mathcal{P}_h^1(\cdot | s^1, a)\|_1 = \max_{\|\mathbf{z}\|_\infty \leq 1} \langle \widehat{\mathcal{P}}_h^{1,k}(\cdot | s^1, a) - \mathcal{P}_h^1(\cdot | s^1, a), \mathbf{z} \rangle_{\mathcal{S}_1}$  by the duality. We construct an  $\varepsilon$ -covering net for the set  $\{\mathbf{z} \in \mathbb{R}^{|\mathcal{S}_1|} : \|\mathbf{z}\|_\infty \leq 1\}$  with the distance induced by  $\|\cdot\|_\infty$ , denoted as  $\mathcal{N}_\varepsilon$ , such that for any  $\mathbf{z} \in \mathbb{R}^{|\mathcal{S}_1|}$ , there always exists  $\mathbf{z}' \in \mathcal{N}_\varepsilon$  satisfying  $\|\mathbf{z} - \mathbf{z}'\|_\infty \leq \varepsilon$ . The covering number is  $|\mathcal{N}_\varepsilon| = 1/\varepsilon^{|\mathcal{S}_1|}$ . Thus, we know that for any  $(s^1, a) \in \mathcal{S}_1 \times \mathcal{A}$  and any  $\mathbf{z}$  with  $\|\mathbf{z}\|_\infty \leq 1$ , there exists  $\mathbf{z}' \in \mathcal{N}_\varepsilon$  such that  $\|\mathbf{z}' - \mathbf{z}\|_\infty \leq \varepsilon$  and

$$\begin{aligned} & \langle \widehat{\mathcal{P}}_h^{1,k}(\cdot | s^1, a) - \mathcal{P}_h^1(\cdot | s^1, a), \mathbf{z} \rangle_{\mathcal{S}_1} \\ &= \langle \widehat{\mathcal{P}}_h^{1,k}(\cdot | s^1, a) - \mathcal{P}_h^1(\cdot | s^1, a), \mathbf{z}' \rangle_{\mathcal{S}_1} + \langle \widehat{\mathcal{P}}_h^{1,k}(\cdot | s^1, a) - \mathcal{P}_h^1(\cdot | s^1, a), \mathbf{z} - \mathbf{z}' \rangle_{\mathcal{S}_1} \\ &\leq \langle \widehat{\mathcal{P}}_h^{1,k}(\cdot | s^1, a) - \mathcal{P}_h^1(\cdot | s^1, a), \mathbf{z}' \rangle_{\mathcal{S}_1} + \varepsilon \left\| \widehat{\mathcal{P}}_h^{1,k}(\cdot | s^1, a) - \mathcal{P}_h^1(\cdot | s^1, a) \right\|_1, \end{aligned}$$

such that we further have

$$\begin{aligned} & \left\| \widehat{\mathcal{P}}_h^{1,k}(\cdot | s^1, a) - \mathcal{P}_h^1(\cdot | s^1, a) \right\|_1 \\ &= \max_{\|\mathbf{z}\|_\infty \leq 1} \langle \widehat{\mathcal{P}}_h^{1,k}(\cdot | s^1, a) - \mathcal{P}_h^1(\cdot | s^1, a), \mathbf{z} \rangle_{\mathcal{S}_1} \\ &\leq \max_{\mathbf{z}' \in \mathcal{N}_\varepsilon} \langle \widehat{\mathcal{P}}_h^{1,k}(\cdot | s^1, a) - \mathcal{P}_h^1(\cdot | s^1, a), \mathbf{z}' \rangle_{\mathcal{S}_1} + \varepsilon \left\| \widehat{\mathcal{P}}_h^{1,k}(\cdot | s^1, a) - \mathcal{P}_h^1(\cdot | s^1, a) \right\|_1. \end{aligned} \quad (26)$$

By Hoeffding's inequality and union bound over all  $\mathbf{z}' \in \mathcal{N}_\varepsilon$ , when  $N_h^k(s^1, a) > 0$ , with probability at least  $1 - \delta'$  where  $\delta' \in (0, 1]$ ,

$$\max_{\mathbf{z}' \in \mathcal{N}_\varepsilon} \langle \widehat{\mathcal{P}}_h^{1,k}(\cdot | s^1, a) - \mathcal{P}_h^1(\cdot | s^1, a), \mathbf{z}' \rangle_{\mathcal{S}_1} \leq \sqrt{\frac{|\mathcal{S}_1| \log(1/\varepsilon) + \log(1/\delta')}{2N_h^k(s^1, a)}}. \quad (27)$$

Letting  $\varepsilon = 1/2$ , by (26) and (27), with probability at least  $1 - \delta'$ , we have

$$\left\| \widehat{\mathcal{P}}_h^{1,k}(\cdot | s^1, a) - \mathcal{P}_h^1(\cdot | s^1, a) \right\|_1 \leq 1 \sqrt{\frac{|\mathcal{S}_1| \log 2 + \log(1/\delta')}{2N_h^k(s^1, a)}}.$$

When  $N_h^k(s^1, a) = 0$ , we have  $\left\| \widehat{\mathcal{P}}_h^{1,k}(\cdot | s^1, a) - \mathcal{P}_h^1(\cdot | s^1, a) \right\|_1 = \|\mathcal{P}_h^1(\cdot | s^1, a)\|_1 = 1$  such that  $2\sqrt{\frac{|\mathcal{S}_1| \log 2 + \log(1/\delta')}{2}} > 1 = \left\| \widehat{\mathcal{P}}_h^{1,k}(\cdot | s^1, a) - \mathcal{P}_h^1(\cdot | s^1, a) \right\|_1$  always holds. Thus, with probability at least  $1 - \delta'$ ,

$$\left\| \widehat{\mathcal{P}}_h^{1,k}(\cdot | s^1, a) - \mathcal{P}_h^1(\cdot | s^1, a) \right\|_1 \leq 2\sqrt{\frac{|\mathcal{S}_1| \log 2 + \log(1/\delta')}{2 \max\{N_h^k(s^1, a), 1\}}} \leq \sqrt{\frac{2|\mathcal{S}_1| \log(2/\delta')}{\max\{N_h^k(s^1, a), 1\}}}.$$

Then, by union bound, assuming  $K > 1$ , letting  $\delta'' = |\mathcal{S}_1| |\mathcal{A}| HK \delta' / 2$ , with probability at least  $1 - \delta''$ , for any  $(s^1, a) \in \mathcal{S}_1 \times \mathcal{A}$  and any  $h \in [H]$  and  $k \in [K]$ , we have

$$\left\| \widehat{\mathcal{P}}_h^{1,k}(\cdot | s^1, a) - \mathcal{P}_h^1(\cdot | s^1, a) \right\|_1 \leq \sqrt{\frac{2|\mathcal{S}_1| \log(|\mathcal{S}_1| |\mathcal{A}| HK / \delta'')}{\max\{N_h^k(s^1, a), 1\}}}.$$

Similarly, we can also obtain that with probability at least  $1 - \delta''$ , for any  $(s^2, a) \in \mathcal{S}_2 \times \mathcal{B}$  and any  $h \in [H]$  and  $k \in [K]$ , we have

$$\left\| \widehat{\mathcal{P}}_h^{2,k}(\cdot | s^2, b) - \mathcal{P}_h^2(\cdot | s^2, b) \right\|_1 \leq \sqrt{\frac{2|\mathcal{S}_2| \log(|\mathcal{S}_2| |\mathcal{B}| HK / \delta'')}{\max\{N_h^k(s^2, b), 1\}}}.$$

Further by union bound, we have with probability at least  $1 - \delta$  where  $\delta = 2\delta''$ ,

$$\left\| \widehat{\mathcal{P}}_h^k(\cdot | s, a, b) - \mathcal{P}_h(\cdot | s, a, b) \right\|_1 \leq \sqrt{\frac{2|\mathcal{S}_1| \log(2|\mathcal{S}_1| |\mathcal{A}| HK / \delta)}{\max\{N_h^k(s^1, a), 1\}}} + \sqrt{\frac{2|\mathcal{S}_2| \log(2|\mathcal{S}_2| |\mathcal{B}| HK / \delta)}{\max\{N_h^k(s^2, b), 1\}}}.$$

This completes the proof.  $\square$

In (9), we set  $\beta_h^{\mathcal{P},k}(s, a, b) = \sqrt{\frac{2H^2|\mathcal{S}_1|\log(2|\mathcal{S}_1||\mathcal{A}|HK/\delta)}{\max\{N_h^k(s^1, a), 1\}}} + \sqrt{\frac{2H^2|\mathcal{S}_2|\log(2|\mathcal{S}_2||\mathcal{B}|HK/\delta)}{\max\{N_h^k(s^2, b), 1\}}}$ , which equals the product of the upper bound in Lemma B.4 and the factor  $H$ .

**Lemma B.5.** *With probability at least  $1 - 2\delta$ , Algorithm 1 ensures that*

$$\sum_{k=1}^K \sum_{h=1}^H \mathbb{E}_{\mu^*, \nu^k} [\bar{\tau}_h^k(s_h, a_h, b_h) \mid s_1] \leq 0.$$

*Proof.* We prove the upper bound of the model prediction error term. We can write the instantaneous prediction error at the  $h$ -step of the  $k$ -th episode as

$$\bar{\tau}_h^k(s, a, b) = r_h(s, a, b) + \langle \mathcal{P}_h(\cdot \mid s, a, b), \bar{V}_{h+1}^k(\cdot) \rangle_{\mathcal{S}} - \bar{Q}_h^k(s, a, b), \quad (28)$$

where the equality is by the definition of the prediction error in (17). By plugging in the definition of  $\bar{Q}_h^k$  in Line (1) of Algorithm 1, for any  $(s, a, b)$ , we bound the following term as

$$\begin{aligned} & r_h(s, a, b) + \langle \mathcal{P}_h(\cdot \mid s, a, b), \bar{V}_{h+1}^k(\cdot) \rangle_{\mathcal{S}} - \bar{Q}_h^k(s, a, b) \\ & \leq r_h(s, a, b) + \langle \mathcal{P}_h(\cdot \mid s, a, b), \bar{V}_{h+1}^k(\cdot) \rangle_{\mathcal{S}} - \min \left\{ \hat{r}_h^k(s, a, b) + \langle \hat{\mathcal{P}}_h^k(\cdot \mid s, a, b), \bar{V}_{h+1}^k(\cdot) \rangle_{\mathcal{S}} - \beta_h^k, H - h + 1 \right\} \\ & \leq \max \left\{ r_h(s, a, b) - \hat{r}_h^k(s, a, b) + \langle \mathcal{P}_h(\cdot \mid s, a, b) - \hat{\mathcal{P}}_h^k(\cdot \mid s, a, b), \bar{V}_{h+1}^k(\cdot) \rangle_{\mathcal{S}} - \beta_h^k, 0 \right\}, \end{aligned} \quad (29)$$

where the inequality holds because

$$\begin{aligned} & r_h(s, a, b) + \langle \mathcal{P}_h(\cdot \mid s, a, b), \bar{V}_{h+1}^k(\cdot) \rangle_{\mathcal{S}} \\ & \leq r_h(s, a, b) + \|\mathcal{P}_h(\cdot \mid s, a, b)\|_1 \|\bar{V}_{h+1}^k(\cdot)\|_{\infty} \leq 1 + \max_{s' \in \mathcal{S}} |\bar{V}_{h+1}^k(s')| \leq 1 + H - h, \end{aligned}$$

since  $\|\mathcal{P}_h(\cdot \mid s, a, b)\|_1 = 1$  and also the truncation step as shown in Line 1 of Algorithm 1 for  $\bar{Q}_{h+1}^k$  such that for any  $s' \in \mathcal{S}$

$$\begin{aligned} |\bar{V}_{h+1}^k(s')| &= \left| [\mu_{h+1}^k(\cdot \mid s')]^\top \bar{Q}_{h+1}^k(s', \cdot, \cdot) \nu_{h+1}^k(\cdot \mid s') \right| \\ &\leq \|\mu_{h+1}^k(\cdot \mid s')\|_1 \|\bar{Q}_{h+1}^k(s', \cdot, \cdot) \nu_{h+1}^k(\cdot \mid s')\|_{\infty} \\ &\leq \max_{a, b} |\bar{Q}_{h+1}^k(s', a, b)| \leq H. \end{aligned} \quad (30)$$

Combining (28) and (29) gives

$$\bar{\tau}_h^k(s, a, b) \leq \max \left\{ r_h(s, a, b) - \hat{r}_h^k(s, a, b) + \langle \mathcal{P}_h(\cdot \mid s, a, b) - \hat{\mathcal{P}}_h^k(\cdot \mid s, a, b), \bar{V}_{h+1}^k(\cdot) \rangle_{\mathcal{S}} - \beta_h^k, 0 \right\}. \quad (31)$$

Note that as shown in (9), we have

$$\beta_h^k(s, a, b) = \beta_h^{r,k}(s, a, b) + \beta_h^{\mathcal{P},k}(s, a, b).$$

Then, with probability at least  $1 - \delta$ , we have

$$\begin{aligned} & r_h(s, a, b) - \hat{r}_h^k(s, a, b) - \beta_h^{r,k}(s, a, b) \\ & \leq |r_h(s, a, b) - \hat{r}_h^k(s, a, b)| - \beta_h^{r,k}(s, a, b) \\ & \leq \beta_h^{r,k}(s, a, b) - \beta_h^{r,k}(s, a, b) = 0, \end{aligned}$$

where the last inequality is by Lemma B.3 and the setting of the bonus for the reward. Moreover, with probability at least  $1 - \delta$ , we have

$$\begin{aligned} & \langle \mathcal{P}_h(\cdot \mid s, a, b) - \hat{\mathcal{P}}_h^k(\cdot \mid s, a, b), \bar{V}_{h+1}^k(\cdot) \rangle_{\mathcal{S}} - \beta_h^{\mathcal{P},k}(s, a, b) \\ & \leq \|\mathcal{P}_h(\cdot \mid s, a, b) - \hat{\mathcal{P}}_h^k(\cdot \mid s, a, b)\|_1 \|\bar{V}_{h+1}^k(\cdot)\|_{\infty} - \beta_h^{\mathcal{P},k}(s, a, b) \\ & \leq H \|\mathcal{P}_h(\cdot \mid s, a, b) - \hat{\mathcal{P}}_h^k(\cdot \mid s, a, b)\|_1 - \beta_h^{\mathcal{P},k}(s, a, b) \\ & \leq \beta_h^{\mathcal{P},k}(s, a, b) - \beta_h^{\mathcal{P},k}(s, a, b) = 0, \end{aligned}$$



where the first inequality is by Cauchy-Schwarz inequality, the second inequality is due to  $\max_{s' \in \mathcal{S}} \|\bar{V}_{h+1}^k(s')\|_\infty \leq H$  as shown in (30), and the last inequality is by the setting of  $\beta_h^{\mathcal{P},k}$  in (9) and also Lemma B.4. Thus, with probability at least  $1 - 2\delta$ , the following inequality holds

$$r_h(s, a, b) - \hat{r}_h^k(s, a, b) + \langle \mathcal{P}_h(\cdot | s, a, b) - \hat{\mathcal{P}}_h^k(\cdot | s, a, b), \bar{V}_{h+1}^k(\cdot) \rangle_{\mathcal{S}} - \beta_h^k(s, a, b) \leq 0.$$

Combining the above inequality with (58), we have that with probability at least  $1 - 2\delta$ , for any  $h \in [H]$  and  $k \in [K]$ , the following inequality holds

$$l_h^k(s, a, b) \leq 0, \quad \forall (s, a, b) \in \mathcal{S} \times \mathcal{A} \times \mathcal{B},$$

which leads to

$$\sum_{k=1}^K \sum_{h=1}^H \mathbb{E}_{\mu^*, \mathcal{P}, \nu^k} [l_h^k(s_h, a_h, b_h) | s_1] \leq 0.$$

This completes the proof.  $\square$

**Lemma B.6.** *With probability at least  $1 - \delta$ , Algorithm 1 ensures that*

$$\sum_{k=1}^K \bar{V}_1^k(s_1) - \sum_{k=1}^K V_1^{\mu^k, \nu^k}(s_1) \leq \tilde{\mathcal{O}}(\sqrt{|\mathcal{S}_1|^2 |\mathcal{A}| H^4 K} + \sqrt{|\mathcal{S}_2|^2 |\mathcal{B}| H^4 K} + \sqrt{|\mathcal{S}_1| |\mathcal{S}_2| |\mathcal{A}| |\mathcal{B}| H^2 K}).$$

*Proof.* We assume that a trajectory  $\{(s_h^k, a_h^k, b_h^k, s_{h+1}^k)\}_{h=1}^H$  for all  $k \in [K]$  is generated according to the policies  $\mu^k, \nu^k$ , and the true transition model  $\mathcal{P}$ . Thus, we expand the bias term at the  $h$ -th step of the  $k$ -th episode, which is

$$\begin{aligned} & \bar{V}_h^k(s_h^k) - V_h^{\mu^k, \nu^k}(s_h^k) \\ &= [\mu_h^k(\cdot | s_h^k)]^\top [\bar{Q}_h^k(s_h^k, \cdot, \cdot) - Q_h^{\mu^k, \nu^k}(s_h^k, \cdot, \cdot)] \nu_h^k(\cdot | s_h^k) \\ &= \zeta_h^k + \bar{Q}_h^k(s_h^k, a_h^k, b_h^k) - Q_h^{\mu^k, \nu^k}(s_h^k, a_h^k, b_h^k) \\ &= \zeta_h^k + \langle \mathcal{P}_h(\cdot | s_h^k, a_h^k, b_h^k), \bar{V}_{h+1}^k(\cdot) - V_{h+1}^{\mu^k, \nu^k}(\cdot) \rangle_{\mathcal{S}} - l_h^k(s_h^k, a_h^k, b_h^k) \\ &= \zeta_h^k + \xi_h^k + \bar{V}_{h+1}^k(s_{h+1}^k) - V_{h+1}^{\mu^k, \nu^k}(s_{h+1}^k) - l_h^k(s_h^k, a_h^k, b_h^k), \end{aligned} \quad (32)$$

where the first equality is by Line 2 of Algorithm 2 and (1), the third equality is by plugging in (2) and (36). Specifically, in the above equality, we introduce two martingale difference sequence, namely,  $\{\zeta_h^k\}_{h \geq 0, k \geq 0}$  and  $\{\xi_h^k\}_{h \geq 0, k \geq 0}$ , which are defined as

$$\begin{aligned} \zeta_h^k &:= [\mu_h^k(\cdot | s_h^k)]^\top [\bar{Q}_h^k(s_h^k, \cdot, \cdot) - Q_h^{\mu^k, \nu^k}(s_h^k, \cdot, \cdot)] \nu_h^k(\cdot | s_h^k) - [\bar{Q}_h^k(s_h^k, a_h^k, b_h^k) - Q_h^{\mu^k, \nu^k}(s_h^k, a_h^k, b_h^k)], \\ \xi_h^k &:= \langle \mathcal{P}_h(\cdot | s_h^k, a_h^k, b_h^k), \bar{V}_{h+1}^k(\cdot) - V_{h+1}^{\mu^k, \nu^k}(\cdot) \rangle_{\mathcal{S}} - [\bar{V}_{h+1}^k(s_{h+1}^k) - V_{h+1}^{\mu^k, \nu^k}(s_{h+1}^k)], \end{aligned}$$

such that

$$\mathbb{E}_{a_h^k \sim \mu_h^k(\cdot | s_h^k), b_h^k \sim \nu_h^k(\cdot | s_h^k)} [\zeta_h^k | \mathcal{F}_h^k] = 0, \quad \mathbb{E}_{s_{h+1}^k \sim \mathcal{P}_h(\cdot | s_h^k, a_h^k, b_h^k)} [\xi_h^k | \tilde{\mathcal{F}}_h^k] = 0,$$

with  $\mathcal{F}_h^k$  being the filtration of all randomness up to  $(h-1)$ -th step of the  $k$ -th episode plus  $s_h^k$ , and  $\tilde{\mathcal{F}}_h^k$  being the filtration of all randomness up to  $(h-1)$ -th step of the  $k$ -th episode plus  $s_h^k, a_h^k, b_h^k$ .

The equality (32) forms a recursion for  $\bar{V}_h^k(s_h^k) - V_h^{\mu^k, \nu^k}(s_h^k)$ . We also have  $\bar{V}_{H+1}^k(\cdot) = \mathbf{0}$  and  $V_{H+1}^{\mu^k, \nu^k}(\cdot) = \mathbf{0}$ . Thus, recursively apply (32) from  $h = 1$  to  $H$  leads to the following equality

$$\bar{V}_1^k(s_1) - V_1^{\mu^k, \nu^k}(s_1) = \sum_{h=1}^H \zeta_h^k + \sum_{h=1}^H \xi_h^k - \sum_{h=1}^H l_h^k(s_h^k, a_h^k, b_h^k). \quad (33)$$

Moreover, by (17) and Line 1 of Algorithm 1, we have

$$\begin{aligned} -\bar{t}_h^k(s_h^k, a_h^k, b_h^k) &= -r_h(s_h^k, a_h^k, b_h^k) - \langle \mathcal{P}_h(\cdot | s_h, a_h, b_h), \bar{V}_{h+1}^k(\cdot) \rangle_{\mathcal{S}} \\ &\quad + \min \{ \widehat{r}_h^k(s_h^k, a_h^k, b_h^k) + \langle \widehat{\mathcal{P}}_h^k(\cdot | s_h, a_h, b_h), \bar{V}_{h+1}^k(\cdot) \rangle_{\mathcal{S}} + \beta_h^k(s_h^k, a_h^k, b_h^k), H \}. \end{aligned}$$

Then, we can further bound  $-\bar{t}_h^k(s_h^k, a_h^k, b_h^k)$  as follows

$$\begin{aligned} -\bar{t}_h^k(s_h^k, a_h^k, b_h^k) &\leq -r_h(s_h^k, a_h^k, b_h^k) - \langle \mathcal{P}_h(\cdot | s_h^k, a_h^k, b_h^k), \bar{V}_{h+1}^k(\cdot) \rangle_{\mathcal{S}} + \widehat{r}_h^k(s_h^k, a_h^k, b_h^k) \\ &\quad + \langle \widehat{\mathcal{P}}_h^k(\cdot | s_h^k, a_h^k, b_h^k), \bar{V}_{h+1}^k(\cdot) \rangle_{\mathcal{S}} + \beta_h^k(s_h^k, a_h^k, b_h^k) \\ &\leq |\widehat{r}_h^k(s_h^k, a_h^k, b_h^k) - r_h(s_h^k, a_h^k, b_h^k)| \\ &\quad + \left| \langle \mathcal{P}_h(\cdot | s_h^k, a_h^k, b_h^k) - \widehat{\mathcal{P}}_h^k(\cdot | s_h^k, a_h^k, b_h^k), \bar{V}_{h+1}^k(\cdot) \rangle_{\mathcal{S}} \right| + \beta_h^k(s_h^k, a_h^k, b_h^k), \end{aligned}$$

where the first inequality is due to  $\min\{x, y\} \leq x$ . Additionally, we have

$$\begin{aligned} &\left| \langle \mathcal{P}_h(\cdot | s_h^k, a_h^k, b_h^k) - \widehat{\mathcal{P}}_h^k(\cdot | s_h^k, a_h^k, b_h^k), \bar{V}_{h+1}^k(\cdot) \rangle_{\mathcal{S}} \right| \\ &\leq \|\bar{V}_{h+1}^k(\cdot)\|_{\infty} \|\mathcal{P}_h(\cdot | s_h^k, a_h^k, b_h^k) - \widehat{\mathcal{P}}_h^k(\cdot | s_h^k, a_h^k, b_h^k)\|_1 \\ &\leq H \|\mathcal{P}_h(\cdot | s_h^k, a_h^k, b_h^k) - \widehat{\mathcal{P}}_h^k(\cdot | s_h^k, a_h^k, b_h^k)\|_1, \end{aligned}$$

where the first inequality is by Cauchy-Schwarz inequality and the second inequality is by (57). Thus, putting the above together, we obtain

$$\begin{aligned} -\bar{t}_h^k(s_h^k, a_h^k, b_h^k) &\leq |\widehat{r}_h^k(s_h^k, a_h^k, b_h^k) - r_h(s_h^k, a_h^k, b_h^k)| + H \|\mathcal{P}_h(\cdot | s_h^k, a_h^k, b_h^k) - \widehat{\mathcal{P}}_h^k(\cdot | s_h^k, a_h^k, b_h^k)\|_1 + \beta_h^k(s_h^k, a_h^k, b_h^k) \\ &\leq 2\beta_h^{r,k}(s_h^k, a_h^k, b_h^k) + 2\beta_h^{\mathcal{P},k}(s_h^k, a_h^k, b_h^k), \end{aligned}$$

where the second inequality is by Lemma B.3, Lemma B.4, and the decomposition of the bonus term  $\beta_h^k$  as (9). Due to Lemma B.3 and Lemma B.4, by union bound, for any  $h \in [H]$ ,  $k \in [K]$  and  $(s_h, a_h, b_h) \in \mathcal{S} \times \mathcal{A} \times \mathcal{B}$ , the above inequality holds with probability at least  $1 - 2\delta$ . Therefore, by (33), with probability at least  $1 - 2\delta$ , we have

$$\begin{aligned} &\sum_{k=1}^K [\bar{V}_1^k(s_1) - V_1^{\mu^k, \nu^k}(s_1)] \\ &\leq \sum_{k=1}^K \sum_{h=1}^H \zeta_h^k + \sum_{k=1}^K \sum_{h=1}^H \xi_h^k + 2 \sum_{k=1}^K \sum_{h=1}^H \beta_h^{r,k}(s_h^k, a_h^k, b_h^k) + 2 \sum_{k=1}^K \sum_{h=1}^H \beta_h^{\mathcal{P},k}(s_h^k, a_h^k, b_h^k). \end{aligned} \tag{34}$$

By Azuma-Hoeffding inequality, with probability at least  $1 - \delta$ , the following inequalities hold

$$\begin{aligned} \sum_{k=1}^K \sum_{h=1}^H \zeta_h^k &\leq \mathcal{O} \left( \sqrt{H^3 K \log \frac{1}{\delta}} \right), \\ \sum_{k=1}^K \sum_{h=1}^H \xi_h^k &\leq \mathcal{O} \left( \sqrt{H^3 K \log \frac{1}{\delta}} \right), \end{aligned}$$

where we use the facts that  $|\bar{Q}_h^k(s_h^k, a_h^k, b_h^k) - Q_h^{\mu^k, \nu^k}(s_h^k, a_h^k, b_h^k)| \leq 2H$  and  $|\bar{V}_{h+1}^k(s_{h+1}^k) - V_{h+1}^{\mu^k, \nu^k}(s_{h+1}^k)| \leq 2H$ . Next, we need to bound  $\sum_{k=1}^K \sum_{h=1}^H \beta_h^{r,k}(s_h^k, a_h^k, b_h^k)$  and  $\sum_{k=1}^K \sum_{h=1}^H \beta_h^{\mathcal{P},k}(s_h^k, a_h^k, b_h^k)$  in (34). We show that

$$\begin{aligned} \sum_{k=1}^K \sum_{h=1}^H \beta_h^{r,k}(s_h^k, a_h^k, b_h^k) &= C \sum_{k=1}^K \sum_{h=1}^H \sqrt{\frac{\log(|\mathcal{S}_1| |\mathcal{S}_2| |\mathcal{A}| |\mathcal{B}| HK / \delta)}{\max\{N_h^k(s_h^{1,k}, s_h^{2,k}, a_h^k, b_h^k), 1\}}} \\ &= C \sum_{k=1}^K \sum_{h=1}^H \sqrt{\frac{\log(|\mathcal{S}_1| |\mathcal{S}_2| |\mathcal{A}| |\mathcal{B}| HK / \delta)}{N_h^k(s_h^{1,k}, s_h^{2,k}, a_h^k, b_h^k)}} \\ &\leq C \sum_{h=1}^H \sum_{(s^1, s^2, a, b) \in \mathcal{S}_1 \times \mathcal{S}_2 \times \mathcal{A} \times \mathcal{B}} \sum_{\substack{N_h^K(s^1, s^2, a, b) \\ N_h^K(s^1, s^2, a, b) > 0}} \sqrt{\frac{\log(|\mathcal{S}_1| |\mathcal{S}_2| |\mathcal{A}| |\mathcal{B}| HK / \delta)}{n}}, \end{aligned}$$

where the second equality is because  $(s_h^{1,k}, s_h^{2,k}, a_h^k, b_h^k)$  is visited such that  $N_h^k(s_h^{1,k}, s_h^{2,k}, a_h^k, b_h^k) \geq 1$ . In addition, we have

$$\begin{aligned} & \sum_{h=1}^H \sum_{\substack{(s^1, s^2, a, b) \in \mathcal{S}_1 \times \mathcal{S}_2 \times \mathcal{A} \times \mathcal{B} \\ N_h^K(s^1, s^2, a, b) > 0}} \sum_{n=1}^{N_h^K(s^1, s^2, a, b)} \sqrt{\frac{\log(|\mathcal{S}_1| |\mathcal{S}_2| |\mathcal{A}| |\mathcal{B}| HK / \delta)}{n}} \\ & \leq \sum_{h=1}^H \sum_{(s^1, s^2, a, b) \in \mathcal{S}_1 \times \mathcal{S}_2 \times \mathcal{A} \times \mathcal{B}} \mathcal{O} \left( \sqrt{N_h^K(s^1, s^2, a, b)} \log \frac{|\mathcal{S}_1| |\mathcal{S}_2| |\mathcal{A}| |\mathcal{B}| HK}{\delta} \right) \\ & \leq \mathcal{O} \left( H \sqrt{K |\mathcal{S}_1| |\mathcal{S}_2| |\mathcal{A}| |\mathcal{B}|} \log \frac{|\mathcal{S}_1| |\mathcal{S}_2| |\mathcal{A}| |\mathcal{B}| HK}{\delta} \right), \end{aligned}$$

where the last inequality is based on the consideration that  $\sum_{(s^1, s^2, a, b) \in \mathcal{S}_1 \times \mathcal{S}_2 \times \mathcal{A} \times \mathcal{B}} N_h^K(s^1, s^2, a, b) = K$  such that  $\sum_{(s^1, s^2, a, b) \in \mathcal{S}_1 \times \mathcal{S}_2 \times \mathcal{A} \times \mathcal{B}} \sqrt{N_h^K(s^1, s^2, a, b)} \leq \mathcal{O} \left( \sqrt{K |\mathcal{S}_1| |\mathcal{S}_2| |\mathcal{A}| |\mathcal{B}|} \right)$  when  $K$  is sufficiently large. Putting the above together, we obtain

$$\sum_{k=1}^K \sum_{h=1}^H \beta_h^{r,k}(s_h^k, a_h^k, b_h^k) \leq \mathcal{O} \left( H \sqrt{K |\mathcal{S}_1| |\mathcal{S}_2| |\mathcal{A}| |\mathcal{B}|} \log \frac{|\mathcal{S}_1| |\mathcal{S}_2| |\mathcal{A}| |\mathcal{B}| HK}{\delta} \right).$$

Similarly, we have

$$\begin{aligned} \sum_{k=1}^K \sum_{h=1}^H \beta_h^{\mathcal{P},k}(s_h^k, a_h^k, b_h^k) &= \sum_{k=1}^K \sum_{h=1}^H \left( \sqrt{\frac{2H^2 |\mathcal{S}_1| \log(2|\mathcal{S}_1| |\mathcal{A}| HK / \delta)}{\max\{N_h^k(s_h^{1,k}, a_h^k), 1\}}} + \sqrt{\frac{2H^2 |\mathcal{S}_2| \log(2|\mathcal{S}_2| |\mathcal{B}| HK / \delta)}{\max\{N_h^k(s_h^{2,k}, b_h^k), 1\}}} \right) \\ &\leq \mathcal{O} \left( H \sqrt{K |\mathcal{S}_1|^2 |\mathcal{A}| H^2} \log \frac{2|\mathcal{S}_1| |\mathcal{A}| HK}{\delta} + H \sqrt{K |\mathcal{S}_2|^2 |\mathcal{B}| H^2} \log \frac{2|\mathcal{S}_2| |\mathcal{B}| HK}{\delta} \right). \end{aligned}$$

Thus, by (34), with probability at least  $1 - \delta$ , we have

$$\sum_{k=1}^K \bar{V}_1^k(s_1) - \sum_{k=1}^K V_1^{\mu^k, \nu^k}(s_1) \leq \tilde{\mathcal{O}} \left( \sqrt{|\mathcal{S}_1|^2 |\mathcal{A}| H^4 K} + \sqrt{|\mathcal{S}_2|^2 |\mathcal{B}| H^4 K} + \sqrt{|\mathcal{S}_1| |\mathcal{S}_2| |\mathcal{A}| |\mathcal{B}| H^2 K} \right),$$

where  $\tilde{\mathcal{O}}$  hides logarithmic terms. This completes the proof.  $\square$

Before presenting the next lemma, we first show the following definition of confidence set for the proof of the next lemma.

**Definition B.7** (Confidence Set for Player 2). *Define the following confidence set for transition models for Player 2*

$$\begin{aligned} \Upsilon^{2,k} &:= \left\{ \tilde{\mathcal{P}} : \left| \tilde{\mathcal{P}}_h(s^{2'} | s^2, b) - \hat{\mathcal{P}}_h^{2,k}(s^{2'} | s^2, b) \right| \leq \epsilon_h^{2,k}, \|\tilde{\mathcal{P}}_h(\cdot | s^2, b)\|_1 = 1, \right. \\ &\quad \left. \text{and } \tilde{\mathcal{P}}_h(s^{2'} | s^2, b) \geq 0, \forall (s^2, b, s^{2'}) \in \mathcal{S}_2 \times \mathcal{B} \times \mathcal{S}_2, \forall k \in [K] \right\} \end{aligned}$$

where we define

$$\epsilon_h^{2,k} := 2 \sqrt{\frac{\hat{\mathcal{P}}_h^{2,k}(s^{2'} | s^2, b) \log(|\mathcal{S}_2| |\mathcal{B}| HK / \delta')}{\max\{N_h^k(s^2, b) - 1, 1\}}} + \frac{14 \log(|\mathcal{S}_2| |\mathcal{B}| HK / \delta')}{3 \max\{N_h^k(s^2, b) - 1, 1\}}$$

with  $N_h^k(s^2, b) := \sum_{\tau=1}^k \mathbf{1}\{(s^2, b) = (s_h^{2,\tau}, b_h^2)\}$ , and  $\hat{\mathcal{P}}^{2,k}$  being the empirical transition model for Player 2.

**Lemma B.8.** *With probability at least  $1 - \delta$ , the difference between  $q_h^{\nu^k, \mathcal{P}^2}$  and  $d_h^{\nu^k, \hat{\mathcal{P}}^{2,k}}$  are bounded as*

$$\sum_{k=1}^K \sum_{h=1}^H \sum_{s^2 \in \mathcal{S}_2} \left| q_h^{\nu^k, \mathcal{P}^2}(s^2) - d_h^{\nu^k, \hat{\mathcal{P}}^{2,k}}(s^2) \right| \leq \tilde{\mathcal{O}} \left( H^2 |\mathcal{S}_2| \sqrt{|\mathcal{B}| K} \right).$$

*Proof.* By the definition of state distribution for Player 2, we have

$$\begin{aligned} \sum_{k=1}^K \sum_{h=1}^H \sum_{s^2 \in \mathcal{S}_2} \left| q_h^{\nu^k, \mathcal{P}^2}(s^2) - d_h^{\nu^k, \widehat{\mathcal{P}}^{2,k}}(s^2) \right| &= \sum_{k=1}^K \sum_{h=1}^H \sum_{s^2 \in \mathcal{S}_2} \left| \sum_{b \in \mathcal{B}} w_h^{2,k}(s^2, b) - \sum_{b \in \mathcal{B}} \widehat{w}_h^{2,k}(s^2, b) \right| \\ &\leq \sum_{k=1}^K \sum_{h=1}^H \sum_{s^2 \in \mathcal{S}_2} \sum_{b \in \mathcal{B}} |w_h^{2,k}(s, a) - \widehat{w}_h^{2,k}(s^2, b)|. \end{aligned}$$

where  $\widehat{w}_h^{2,k}(s^2, b)$  is the occupancy measure under the empirical transition model  $\widehat{\mathcal{P}}^{2,k}$  and the policy  $\nu^k$ . Then, since  $\widehat{\mathcal{P}}^{2,k} \in \Upsilon^{2,k}$  always holds for any  $k$ , by Lemma B.11, we can bound the last term of the bound inequality such that with probability at least  $1 - 6\delta'$ ,

$$\sum_{k=1}^K \sum_{h=1}^H \sum_{s^2 \in \mathcal{S}_2} \left| q_h^{\nu^k, \mathcal{P}^2}(s^2) - d_h^{\nu^k, \widehat{\mathcal{P}}^{2,k}}(s^2) \right| \leq \mathcal{E}_1 + \mathcal{E}_2.$$

Then, we compute  $\mathcal{E}_1$  by Lemma B.10. With probability at least  $1 - 2\delta'$ , we have

$$\begin{aligned} \mathcal{E}_1 &= \mathcal{O} \left[ \sum_{h=2}^H \sum_{h'=1}^{h-1} \sum_{k=1}^K \sum_{s^2 \in \mathcal{S}_2} \sum_{b \in \mathcal{B}} w_h^k(s^2, b) \left( \sqrt{\frac{|\mathcal{S}_2| \log(|\mathcal{S}_2| |\mathcal{B}| HK / \delta')}{\max\{N_h^k(s^2, b), 1\}}} + \frac{\log(|\mathcal{S}_2| |\mathcal{B}| HK / \delta')}{\max\{N_h^k(s^2, b), 1\}} \right) \right] \\ &= \mathcal{O} \left[ \sum_{h=2}^H \sum_{h'=1}^{h-1} \sqrt{|\mathcal{S}_2|} \left( \sqrt{|\mathcal{S}_2| |\mathcal{B}| K} + |\mathcal{S}_2| |\mathcal{B}| \log K + \log \frac{H}{\delta'} \right) \log \frac{|\mathcal{S}_2| |\mathcal{B}| HK}{\delta'} \right] \\ &= \mathcal{O} \left[ \left( H^2 |\mathcal{S}_2| \sqrt{|\mathcal{B}| K} + H^2 |\mathcal{S}_2|^{3/2} |\mathcal{B}| \log K + H^2 \sqrt{|\mathcal{S}_2|} \log \frac{H}{\delta'} \right) \log \frac{|\mathcal{S}_2| |\mathcal{B}| HK}{\delta'} \right] \\ &= \widetilde{\mathcal{O}} \left( H^2 |\mathcal{S}_2| \sqrt{|\mathcal{B}| K} \right), \end{aligned}$$

where we ignore  $\log K$  when  $K$  is sufficiently large such that  $\sqrt{K}$  dominates, and  $\widetilde{\mathcal{O}}$  hides logarithm dependence on  $|\mathcal{S}_2|$ ,  $|\mathcal{B}|$ ,  $H$ ,  $K$ , and  $1/\delta'$ . In addition,  $\mathcal{E}_2$  depends on  $\text{poly}(H, |\mathcal{S}_2|, |\mathcal{B}|)$  except the factor  $\log \frac{|\mathcal{S}_2| |\mathcal{B}| HK}{\delta'}$  as shown in Lemma B.11. Thus,  $\mathcal{E}_2$  can be ignored comparing to  $\mathcal{E}_1$  if  $K$  is sufficiently large. Therefore, we obtain that with probability at least  $1 - 8\delta'$ , the following inequality holds

$$\sum_{k=1}^K \sum_{h=1}^H \sum_{s^2 \in \mathcal{S}_2} \left| q_h^{\nu^k, \mathcal{P}^2}(s^2) - d_h^{\nu^k, \widehat{\mathcal{P}}^{2,k}}(s^2) \right| \leq \widetilde{\mathcal{O}} \left( H^2 |\mathcal{S}_2| \sqrt{|\mathcal{B}| K} \right).$$

We further let  $\delta = 8\delta'$  such that  $\log \frac{|\mathcal{S}_2| |\mathcal{B}| HK}{\delta'} = \log \frac{8|\mathcal{S}_2| |\mathcal{B}| HK}{\delta}$  which does not change the order as above. Then, with probability at least  $1 - \delta$ , we have  $\sum_{k=1}^K \sum_{h=1}^H \sum_{s^2 \in \mathcal{S}_2} |q_h^{\nu^k, \mathcal{P}^2}(s^2) - d_h^{\nu^k, \widehat{\mathcal{P}}^{2,k}}(s^2)| \leq \widetilde{\mathcal{O}}(H^2 |\mathcal{S}_2| \sqrt{|\mathcal{B}| K})$ . This completes the proof.  $\square$

### B.1. Other Supporting Lemmas

The following lemmas are adapted from the recent papers (Efroni et al., 2020; Jin & Luo, 2019), where we can find their detailed proofs.

**Lemma B.9.** *With probability at least  $1 - 4\delta'$ , the true transition model  $\mathcal{P}^2$  satisfies that for any  $k \in [K]$ ,*

$$\mathcal{P} \in \Upsilon^{2,k}.$$

This lemma indicates that the estimated transition model  $\widehat{\mathcal{P}}_h^{2,k}(s^{2'}|s^2, b)$  for Player 2 by (11) is closed to the true transition model  $\mathcal{P}_h^2(s^{2'}|s^2, b)$  with high probability. The upper bound is by empirical Bernstein's inequality and the union bound.

The next lemma is adapted from Lemma 10 in Jin & Luo (2019).

**Lemma B.10.** We let  $w_h^{2,k}(s^2, b)$  denote the occupancy measure at the  $h$ -th step of the  $k$ -th episode under the true transition model  $\mathcal{P}^2$  and the current policy  $\nu^k$ . Then, with probability at least  $1 - 2\delta'$  we have for all  $h \in [H]$ , the following inequalities hold

$$\sum_{k=1}^K \sum_{s^2 \in \mathcal{S}_2} \sum_{b \in \mathcal{B}} \frac{w_h^k(s^2, b)}{\max\{N_h^k(s^2, b), 1\}} = \mathcal{O}\left(|\mathcal{S}_2||\mathcal{B}| \log K + \log \frac{H}{\delta'}\right),$$

and

$$\sum_{k=1}^K \sum_{s^2 \in \mathcal{S}_2} \sum_{b \in \mathcal{B}} \frac{w_h^k(s^2, b)}{\sqrt{\max\{N_h^k(s^2, b), 1\}}} = \mathcal{O}\left(\sqrt{|\mathcal{S}_2||\mathcal{B}|K} + |\mathcal{S}_2||\mathcal{B}| \log K + \log \frac{H}{\delta'}\right).$$

By Lemma B.9 and Lemma B.10, we have the following lemma to show the difference of two occupancy measures, which is modified from parts of the proof of Lemma 4 in Jin & Luo (2019).

**Lemma B.11.** For Player 2, we let  $w_h^{2,k}(s^2, b)$  be the occupancy measure at the  $h$ -th step of the  $k$ -th episode under the true transition model  $\mathcal{P}^2$  and the current policy  $\nu^k$ , and  $\tilde{w}_h^{2,k}(s^2, b)$  be the occupancy measure at the  $h$ -th step of the  $k$ -th episode under any transition model  $\tilde{\mathcal{P}}^{2,k} \in \Upsilon^k$  and the current policy  $\nu^k$  for any  $k$ . Then, with probability at least  $1 - 6\delta'$  we have for all  $h \in [H]$ , the following inequalities hold

$$\sum_{k=1}^K \sum_{h=1}^K \sum_{s \in \mathcal{S}_2} \sum_{b \in \mathcal{B}} |\tilde{w}_h^{2,k}(s^2, b) - w_h^{2,k}(s^2, b)| \leq \mathcal{E}_1 + \mathcal{E}_2,$$

where  $\mathcal{E}_1$  and  $\mathcal{E}_2$  are in the level of

$$\mathcal{E}_1 = \mathcal{O}\left[\sum_{h=2}^H \sum_{h'=1}^{h-1} \sum_{k=1}^K \sum_{s^2 \in \mathcal{S}_2} \sum_{b \in \mathcal{B}} w_h^k(s^2, b) \left(\sqrt{\frac{|\mathcal{S}_2| \log(|\mathcal{S}_2||\mathcal{B}|HK/\delta')}{\max\{N_h^k(s^2, b), 1\}}} + \frac{\log(|\mathcal{S}_2||\mathcal{B}|HK/\delta')}{\max\{N_h^k(s^2, b), 1\}}\right)\right]$$

and

$$\mathcal{E}_2 = \mathcal{O}\left(\text{poly}(H, |\mathcal{S}_2|, |\mathcal{B}|) \cdot \log \frac{|\mathcal{S}_2||\mathcal{B}|HK}{\delta'}\right),$$

where  $\text{poly}(H, |\mathcal{S}_2|, |\mathcal{B}|)$  denotes the polynomial dependency on  $H, |\mathcal{S}_2|, |\mathcal{B}|$ .

## C. Proofs for Section 4

**Lemma C.1.** At the  $k$ -th episode, the difference between value functions  $V_1^{\mu^*, \nu^k}(s_1)$  and  $V_1^{\mu^k, \nu^k}(s_1)$  is

$$\begin{aligned} V_1^{\mu^*, \nu^k}(s_1) - V_1^{\mu^k, \nu^k}(s_1) &= \bar{V}_1^k(s_1) - V_1^{\mu^k, \nu^k}(s_1) \\ &+ \sum_{h=1}^H \mathbb{E}_{\mu^*, \mathcal{P}} \left[ \langle \mu_h^*(\cdot | s_h) - \mu_h^k(\cdot | s_h), U_h^k(s_h, \cdot) \rangle_{\mathcal{A}} \mid s_1 \right] \\ &+ \sum_{h=1}^H \mathbb{E}_{\mu^*, \mathcal{P}, \nu^k} \left[ \bar{\zeta}_h^k(s_h, a_h, b_h) \mid s_1 \right]. \end{aligned} \quad (35)$$

where  $s_h, a_h, b_h$  are random variables for state and actions,  $U_h^k(s, a) := \langle \bar{Q}_h^k(s, a, \cdot), \nu_h^k(\cdot | s) \rangle_{\mathcal{B}}$ , and we define the model prediction error of  $Q$ -function as

$$\bar{\zeta}_h^k(s, a, b) = r_h(s, a, b) + \mathcal{P}_h \bar{V}_{h+1}^k(s, a) - \bar{Q}_h^k(s, a, b). \quad (36)$$

*Proof.* We start the proof by decomposing the value function difference as

$$V_1^{\mu^*, \nu^k}(s_1) - V_1^{\mu^k, \nu^k}(s_1) = V_1^{\mu^*, \nu^k}(s_1) - \bar{V}_1^k(s_1) + \bar{V}_1^k(s_1) - V_1^{\mu^k, \nu^k}(s_1). \quad (37)$$

Note that the term  $\bar{V}_1^k(s_1) - V_1^{\mu^*, \nu^k}(s_1)$  is the bias between the estimated value function  $\bar{V}_1^k(s_1)$  generated by Algorithm 2 and the value function  $V_1^{\mu^*, \nu^k}(s_1)$  under the true transition model  $\mathcal{P}$  at the  $k$ -th episode.

We focus on analyzing the other term  $V_1^{\mu^*, \nu^k}(s_1) - \bar{V}_1^k(s_1)$  in this proof. For any  $h$  and  $s$ , we have

$$\begin{aligned}
 & V_h^{\mu^*, \nu^k}(s) - \bar{V}_h^k(s) \\
 &= [\mu_h^*(\cdot|s)]^\top Q_h^{\mu^*, \nu^k}(s, \cdot, \cdot) \nu_h^k(\cdot|s) - [\mu_h^k(\cdot|s)]^\top \bar{Q}_h^k(s, \cdot, \cdot) \nu_h^k(\cdot|s) \\
 &= [\mu_h^*(\cdot|s)]^\top Q_h^{\mu^*, \nu^k}(s, \cdot, \cdot) \nu_h^k(\cdot|s) - [\mu_h^*(\cdot|s)]^\top \bar{Q}_h^k(s, \cdot, \cdot) \nu_h^k(\cdot|s) \\
 &\quad + [\mu_h^*(\cdot|s)]^\top \bar{Q}_h^k(s, \cdot, \cdot) \nu_h^k(\cdot|s) - [\mu_h^k(\cdot|s)]^\top \bar{Q}_h^k(s, \cdot, \cdot) \nu_h^k(\cdot|s) \\
 &= [\mu_h^*(\cdot|s)]^\top [Q_h^{\mu^*, \nu^k}(s, \cdot, \cdot) - \bar{Q}_h^k(s, \cdot, \cdot)] \nu_h^k(\cdot|s) \\
 &\quad + [\mu_h^*(\cdot|s) - \mu_h^k(\cdot|s)]^\top \bar{Q}_h^k(s, \cdot, \cdot) \nu_h^k(\cdot|s),
 \end{aligned} \tag{38}$$

where the first inequality is by the definition of  $V_h^{\mu^*, \nu^k}$  in (1) and the definition of  $\bar{V}_h^k$  in Line 2 of Algorithm 2. Moreover, by the definition of  $Q_h^{\mu^*, \nu^k}(s, \cdot, \cdot)$  in (2) and the model prediction error  $\bar{\zeta}_h^k$  for Player one in (36), we have

$$\begin{aligned}
 & [\mu_h^*(\cdot|s)]^\top [Q_h^{\mu^*, \nu^k}(s, \cdot, \cdot) - \bar{Q}_h^k(s, \cdot, \cdot)] \nu_h^k(\cdot|s) \\
 &= \sum_{a \in \mathcal{A}} \sum_{b \in \mathcal{B}} \mu_h^*(a|s) \left[ \sum_{s' \in \mathcal{S}} \mathcal{P}_h(s'|s, a) [V_{h+1}^{\mu^*, \nu^k}(s') - \bar{V}_{h+1}^k(s')] + \bar{\zeta}_h^k(s, a, b) \right] \nu_h^k(b|s) \\
 &= \sum_{a \in \mathcal{A}} \sum_{s' \in \mathcal{S}} \mu_h^*(a|s) \mathcal{P}_h(s'|s, a) [V_{h+1}^{\mu^*, \nu^k}(s') - \bar{V}_{h+1}^k(s')] + \sum_{a \in \mathcal{A}} \sum_{b \in \mathcal{B}} \mu_h^*(a|s) \bar{\zeta}_h^k(s, a, b) \nu_h^k(b|s).
 \end{aligned}$$

where the last equality holds due to  $\sum_{b \in \mathcal{B}} \nu_h^k(b|s) = 1$ . Combining this equality with (38) gives

$$\begin{aligned}
 V_h^{\mu^*, \nu^k}(s) - \bar{V}_h^k(s) &= \sum_{a \in \mathcal{A}} \sum_{s' \in \mathcal{S}} \mu_h^*(a|s) \mathcal{P}_h(s'|s, a) [V_{h+1}^{\mu^*, \nu^k}(s') - \bar{V}_{h+1}^k(s')] \\
 &\quad + \sum_{a \in \mathcal{A}} \sum_{b \in \mathcal{B}} \mu_h^*(a|s) \bar{\zeta}_h^k(s, a, b) \nu_h^k(b|s) \\
 &\quad + \sum_{a \in \mathcal{A}} \sum_{b \in \mathcal{B}} [\mu_h^*(a|s) - \mu_h^k(a|s)] \bar{Q}_h^k(s, a, b) \nu_h^k(b|s).
 \end{aligned} \tag{39}$$

Note that (39) indicates a recursion of the value function difference  $V_h^{\mu^*, \nu^k}(s) - \bar{V}_h^k(s)$ . Since we define  $V_{H+1}^{\mu^*, \nu^k}(s) = 0$  and  $\bar{V}_{H+1}^k(s) = 0$ , by recursively applying (39) from  $h = 1$  to  $H$ , we obtain

$$\begin{aligned}
 & V_1^{\mu^*, \nu^k}(s_1) - \bar{V}_1^k(s_1) \\
 &= \sum_{h=1}^H \mathbb{E}_{\mu^*, \mathcal{P}} \{ [\mu_h^*(\cdot|s_h)]^\top \bar{\zeta}_h^k(s_h, \cdot, \cdot) \nu_h^k(\cdot|s_h) \mid s_1 \} \\
 &\quad + \sum_{h=1}^H \mathbb{E}_{\mu^*, \mathcal{P}} \{ [\mu_h^*(\cdot|s_h) - \mu_h^k(\cdot|s_h)]^\top \bar{Q}_h^k(s_h, \cdot, \cdot) \nu_h^k(\cdot|s_h) \mid s_1 \},
 \end{aligned} \tag{40}$$

where  $s_h$  are a random variables denoting the state at the  $h$ -th step following a distribution determined jointly by  $\mu^*, \mathcal{P}$ .

Further combining (40) with (37), we eventually have

$$\begin{aligned}
 & V_1^{\mu^*, \nu^k}(s_1) - V_1^{\mu^k, \nu^k}(s_1) \\
 &= \bar{V}_1^k(s_1) - V_1^{\mu^k, \nu^k}(s_1) + \sum_{h=1}^H \mathbb{E}_{\mu^*, \mathcal{P}} \{ [\mu_h^*(\cdot | s_h)]^\top \bar{\zeta}_h^k(s_h, \cdot, \cdot) \nu_h^k(\cdot | s_h) \mid s_1 \} \\
 &\quad + \sum_{h=1}^H \mathbb{E}_{\mu^*, \mathcal{P}} \{ [\mu_h^*(\cdot | s_h) - \mu_h^k(\cdot | s_h)]^\top \bar{Q}_h^k(s_h, \cdot, \cdot) \nu_h^k(\cdot | s_h) \mid s_1 \} \\
 &= \bar{V}_1^k(s_1) - V_1^{\mu^k, \nu^k}(s_1) + \sum_{h=1}^H \mathbb{E}_{\mu^*, \mathcal{P}, \nu^k} [\bar{\zeta}_h^k(s_h, a_h, b_h) \mid s_1] \\
 &\quad + \sum_{h=1}^H \mathbb{E}_{\mu^*, \mathcal{P}} \left[ \langle \mu_h^*(\cdot | s_h) - \mu_h^k(\cdot | s_h), U_h^k(s_h, \cdot) \rangle_{\mathcal{A}} \mid s_1 \right],
 \end{aligned}$$

where  $s_h, a_h, b_h$  are a random variables denoting the state and actions at the  $h$ -th step following a distribution determined jointly by  $\mu^*, \mathcal{P}, \nu^k$ , and  $U_h^{k-1}(s, a) := \langle \bar{Q}_h^{k-1}(s, a, \cdot), \nu_h^{k-1}(\cdot | s) \rangle_{\mathcal{B}}$ . This completes our proof.  $\square$

**Lemma C.2.** *At the  $k$ -th episode, with probability at least  $1 - 2\delta$ , the difference between the value functions  $V_1^{\mu^k, \nu^k}(s_1)$  and  $V_1^{\mu^k, \nu^*}(s_1)$  is bound as*

$$\begin{aligned}
 & V_1^{\mu^k, \nu^k}(s_1) - V_1^{\mu^k, \nu^*}(s_1) \leq 2 \sum_{h=1}^H \sum_{s \in \mathcal{S}} \left| q_h^{\mu^k, \mathcal{P}}(s) - d_h^k(s) \right| \\
 &\quad + \sum_{h=1}^H \sum_{s \in \mathcal{S}} d_h^k(s) \langle W_h^k(s, \cdot), \nu_h^k(\cdot | s) - \nu_h^*(\cdot | s) \rangle_{\mathcal{B}} \\
 &\quad + 2 \sum_{h=1}^H \mathbb{E}_{\mu^k, \mathcal{P}, \nu^k} [\beta_h^{r, k}(s_h, a_h, b_h) \mid s_1],
 \end{aligned} \tag{41}$$

where  $s_h, a_h, b_h$  are random variables for state and actions, and  $W_h^k(s, b) = \langle \bar{r}_h^k(s, \cdot, b), \mu_h^k(\cdot | s) \rangle_{\mathcal{A}}$ .

*Proof.* We start our proof from analyzing the difference for any  $h$  and  $s$  as follows

$$\begin{aligned}
 & V_h^{\mu^k, \nu^k}(s) - V_h^{\mu^k, \nu^*}(s) \\
 &= [\mu_h^k(\cdot | s)]^\top Q_h^{\mu^k, \nu^k}(s, \cdot, \cdot) \nu_h^k(\cdot | s) - [\mu_h^k(\cdot | s)]^\top Q_h^{\mu^k, \nu^*}(s, \cdot, \cdot) \nu_h^*(\cdot | s) \\
 &= [\mu_h^k(\cdot | s)]^\top Q_h^{\mu^k, \nu^k}(s, \cdot, \cdot) \nu_h^k(\cdot | s) - [\mu_h^k(\cdot | s)]^\top Q_h^{\mu^k, \nu^k}(s, \cdot, \cdot) \nu_h^*(\cdot | s) \\
 &\quad + [\mu_h^k(\cdot | s)]^\top Q_h^{\mu^k, \nu^k}(s, \cdot, \cdot) \nu_h^*(\cdot | s) - [\mu_h^k(\cdot | s)]^\top Q_h^{\mu^k, \nu^*}(s, \cdot, \cdot) \nu_h^*(\cdot | s) \\
 &= [\mu_h^k(\cdot | s)]^\top Q_h^{\mu^k, \nu^k}(s, \cdot, \cdot) [\nu_h^k(\cdot | s) - \nu_h^*(\cdot | s)] \\
 &\quad + [\mu_h^k(\cdot | s)]^\top [Q_h^{\mu^k, \nu^k}(s, \cdot, \cdot) - Q_h^{\mu^k, \nu^*}(s, \cdot, \cdot)] \nu_h^*(\cdot | s),
 \end{aligned} \tag{42}$$

where the first equality is by the Bellman equation for  $V_h^{\mu, \nu}(s)$  in (1). Moreover, by the Bellman equation for  $Q_h^{\mu, \nu}$  in (2), we can expand the last term in (42) as

$$\begin{aligned}
 & [\mu_h^k(\cdot | s)]^\top [Q_h^{\mu^k, \nu^k}(s, \cdot, \cdot) - Q_h^{\mu^k, \nu^*}(s, \cdot, \cdot)] \nu_h^*(\cdot | s) \\
 &= \sum_{a \in \mathcal{A}} \sum_{b \in \mathcal{B}} \mu_h^k(a | s) \sum_{s' \in \mathcal{S}} \mathcal{P}_h(s' | s, a) [V_{h+1}^{\mu^k, \nu^k}(s') - V_{h+1}^{\mu^k, \nu^*}(s')] \nu_h^*(b | s) \\
 &= \sum_{a \in \mathcal{A}} \sum_{s' \in \mathcal{S}} \mu_h^k(a | s) \mathcal{P}_h(s' | s, a) [V_{h+1}^{\mu^k, \nu^k}(s') - V_{h+1}^{\mu^k, \nu^*}(s')].
 \end{aligned} \tag{43}$$

where the last equality holds due to  $\sum_{b \in \mathcal{B}} \nu_h^*(b|s) = 1$ . Combining (43) with (42) gives

$$\begin{aligned} V_h^{\mu^k, \nu^k}(s) - V_h^{\mu^k, \nu^*}(s) &= \sum_{a \in \mathcal{A}} \sum_{b \in \mathcal{B}} \mu_h^k(a|s) Q_h^{\mu^k, \nu^k}(s, a, b) [\nu_h^k(b|s) - \nu_h^*(b|s)] \\ &\quad + \sum_{a \in \mathcal{A}} \sum_{s' \in \mathcal{S}} \mu_h^k(a|s) \mathcal{P}_h(s'|s, a) [V_{h+1}^{\mu^k, \nu^k}(s') - V_{h+1}^{\mu^k, \nu^*}(s')]. \end{aligned} \quad (44)$$

Note that (44) indicates a recursion of the value function difference  $V_h^{\mu^k, \nu^k}(s) - V_h^{\mu^k, \nu^*}(s)$ . Since we define  $V_{H+1}^{\mu, \nu}(s) = 0$  for any  $\mu$  and  $\nu$ , by recursively applying (44) from  $h = 1$  to  $H$ , we obtain

$$V_1^{\mu^k, \nu^k}(s_1) - V_1^{\mu^k, \nu^*}(s_1) = \sum_{h=1}^H \mathbb{E}_{\mu^k, \mathcal{P}} \{ [\mu_h^k(\cdot|s_h)]^\top Q_h^{\mu^k, \nu^k}(s_h, \cdot, \cdot) [\nu_h^k(\cdot|s_h) - \nu_h^*(\cdot|s_h)] \mid s_1 \}, \quad (45)$$

where  $s_h$  are a random variables following a distribution determined jointly by  $\mu^k, \mathcal{P}$ . Note that since we have defined the distribution of  $s_h$  under  $\mu^k$  and  $\mathcal{P}$  as

$$q_h^{\mu^k, \mathcal{P}}(s) = \Pr(s_h = s \mid \mu^k, \mathcal{P}, s_1),$$

we can rewrite (45) as

$$V_1^{\mu^k, \nu^k}(s_1) - V_1^{\mu^k, \nu^*}(s_1) = \sum_{h=1}^H \sum_{s \in \mathcal{S}} \sum_{a \in \mathcal{A}} \sum_{b \in \mathcal{B}} q_h^{\mu^k, \mathcal{P}}(s) \mu_h^k(a|s) Q_h^{\mu^k, \nu^k}(s, a, b) [\nu_h^k(b|s) - \nu_h^*(b|s)]. \quad (46)$$

By plugging the Bellman equation for Q-function as (2) into (46), we further expand (46) as

$$\begin{aligned} &V_1^{\mu^k, \nu^k}(s_1) - V_1^{\mu^k, \nu^*}(s_1) \\ &= \sum_{h=1}^H \sum_{s \in \mathcal{S}} \sum_{a \in \mathcal{A}} \sum_{b \in \mathcal{B}} q_h^{\mu^k, \mathcal{P}}(s) \mu_h^k(a|s) [r_h(s, a, b) + \langle \mathcal{P}_h(\cdot|s, a), V_{h+1}^{\mu^k, \nu^k}(\cdot) \rangle] [\nu_h^k(b|s) - \nu_h^*(b|s)] \\ &= \sum_{h=1}^H \sum_{s \in \mathcal{S}} \sum_{a \in \mathcal{A}} \sum_{b \in \mathcal{B}} q_h^{\mu^k, \mathcal{P}}(s) \mu_h^k(a|s) [r_h(s, a, b)] [\nu_h^k(b|s) - \nu_h^*(b|s)] \\ &= \sum_{h=1}^H \sum_{s \in \mathcal{S}} q_h^{\mu^k, \mathcal{P}}(s) [\mu_h^k(\cdot|s)]^\top r_h(s, \cdot, \cdot) [\nu_h^k(\cdot|s) - \nu_h^*(\cdot|s)], \end{aligned}$$

where the second equality by

$$\begin{aligned} &\sum_{h=1}^H \sum_{s \in \mathcal{S}} \sum_{a \in \mathcal{A}} \sum_{b \in \mathcal{B}} q_h^{\mu^k, \mathcal{P}}(s) \mu_h^k(a|s) \langle \mathcal{P}_h(\cdot|s, a), V_{h+1}^{\mu^k, \nu^k}(\cdot) \rangle_{\mathcal{S}} [\nu_h^k(b|s) - \nu_h^*(b|s)] \\ &= \sum_{h=1}^H \sum_{s \in \mathcal{S}} \sum_{a \in \mathcal{A}} q_h^{\mu^k, \mathcal{P}}(s) \mu_h^k(a|s) \langle \mathcal{P}_h(\cdot|s, a), V_{h+1}^{\mu^k, \nu^k}(\cdot) \rangle_{\mathcal{S}} \sum_{b \in \mathcal{B}} [\nu_h^k(b|s) - \nu_h^*(b|s)] \\ &= 0. \end{aligned}$$

In particular, the last equality above is due to

$$\sum_{b \in \mathcal{B}} [\nu_h^k(b|s) - \nu_h^*(b|s)] = 1 - 1 = 0.$$

Thus, we have

$$V_1^{\mu^k, \nu^k}(s_1) - V_1^{\mu^k, \nu^*}(s_1) = \sum_{h=1}^H \sum_{s \in \mathcal{S}} q_h^{\mu^k, \mathcal{P}}(s) [\mu_h^k(\cdot|s)]^\top r_h(s, \cdot, \cdot) [\nu_h^k(\cdot|s) - \nu_h^*(\cdot|s)]. \quad (47)$$



Now we define the following term associated with estimation  $\widehat{\mathcal{P}}^k, \widehat{r}^k$ , policies  $\mu^k, \nu^k$ , and the initial state  $s_1$  as

$$\underline{V}_1^k(s_1) := \sum_{h=1}^H \sum_{s \in \mathcal{S}} q_h^{\mu^k, \widehat{\mathcal{P}}^k}(s) [\mu_h^k(\cdot|s)]^\top \widehat{r}_h^k(s, \cdot, \cdot) \nu_h^k(\cdot|s),$$

with  $\widetilde{r}$  defined in Line 3 of Algorithm 3, which is

$$\widetilde{r}_h^k(s, a, b) = \max \{ \widehat{r}_h^k(s, a, b) - \beta_h^{r,k}(s, a, b), 0 \}.$$

Thus, we have the following decomposition

$$\begin{aligned} & V_1^{\mu^k, \nu^k}(s_1) - V_1^{\mu^k, \nu^*}(s_1) \\ &= V_1^{\mu^k, \nu^k}(s_1) - \underline{V}_1^k(s_1) + \underline{V}_1^k(s_1) - V_1^{\mu^k, \nu^*}(s_1) \\ &= \underbrace{\sum_{h=1}^H \sum_{s \in \mathcal{S}} \left\{ q_h^{\mu^k, \mathcal{P}}(s) [\mu_h^k(\cdot|s)]^\top r_h(s, \cdot, \cdot) \nu_h^k(\cdot|s) - q_h^{\mu^k, \widehat{\mathcal{P}}^k}(s) [\mu_h^k(\cdot|s)]^\top \widehat{r}_h^k(s, \cdot, \cdot) \nu_h^k(\cdot|s) \right\}}_{\text{Term(I)}} \\ & \quad + \underbrace{\sum_{h=1}^H \sum_{s \in \mathcal{S}} \left\{ q_h^{\mu^k, \widehat{\mathcal{P}}^k}(s) [\mu_h^k(\cdot|s)]^\top \widetilde{r}_h^k(s, \cdot, \cdot) \nu_h^k(\cdot|s) - q_h^{\mu^k, \mathcal{P}}(s) [\mu_h^k(\cdot|s)]^\top r_h(s, \cdot, \cdot) \nu_h^*(\cdot|s) \right\}}_{\text{Term(II)}}. \end{aligned} \tag{48}$$

We first bound Term(I) as

$$\begin{aligned} \text{Term(I)} &= \sum_{h=1}^H \sum_{s \in \mathcal{S}} \left\{ q_h^{\mu^k, \mathcal{P}}(s) [\mu_h^k(\cdot|s)]^\top r_h(s, \cdot, \cdot) \nu_h^k(\cdot|s) - q_h^{\mu^k, \widehat{\mathcal{P}}^k}(s) [\mu_h^k(\cdot|s)]^\top \widehat{r}_h^k(s, \cdot, \cdot) \nu_h^k(\cdot|s) \right\} \\ &= \sum_{h=1}^H \sum_{s \in \mathcal{S}} q_h^{\mu^k, \mathcal{P}}(s) [\mu_h^k(\cdot|s)]^\top [r_h(s, \cdot, \cdot) - \widehat{r}_h^k(s, \cdot, \cdot)] \nu_h^k(\cdot|s) \\ & \quad + \sum_{h=1}^H \sum_{s \in \mathcal{S}} [q_h^{\mu^k, \mathcal{P}}(s) - q_h^{\mu^k, \widehat{\mathcal{P}}^k}(s)] [\mu_h^k(\cdot|s)]^\top \widehat{r}_h^k(s, \cdot, \cdot) \nu_h^k(\cdot|s) \\ &\leq 2 \sum_{h=1}^H \mathbb{E}_{\mu^k, \mathcal{P}, \nu^k} [\beta_h^{r,k}(s, a, b)] + \sum_{h=1}^H \sum_{s \in \mathcal{S}} |q_h^{\mu^k, \mathcal{P}}(s) - q_h^{\mu^k, \widehat{\mathcal{P}}^k}(s)|, \end{aligned}$$

where the inequality is due to  $|\widehat{r}_h^k(s, a, b) - r_h(s, a, b)| \leq \beta_h^{r,k}(s, a, b)$  with probability at least  $1 - \delta$  because of Lemma C.4 such that we have

$$\begin{aligned} r_h(s, a, b) - \widehat{r}_h^k(s, a, b) &= r_h(s, a, b) - \max \{ \widehat{r}_h^k(s, a, b) - \beta_h^{r,k}(s, a, b), 0 \} \\ &= \min \{ r_h(s, a, b) - \widehat{r}_h^k(s, a, b) + \beta_h^{r,k}(s, a, b), r_h(s, a, b) \} \\ &\leq r_h(s, a, b) - \widehat{r}_h^k(s, a, b) + \beta_h^{r,k}(s, a, b) \leq 2\beta_h^{r,k}(s, a, b), \end{aligned}$$

which yields

$$\sum_{s \in \mathcal{S}} q_h^{\mu^k, \mathcal{P}}(s) [\mu_h^k(\cdot|s)]^\top [r_h(s, \cdot, \cdot) - \widehat{r}_h^k(s, \cdot, \cdot)] \nu_h^k(\cdot|s) \leq 2\mathbb{E}_{\mu^k, \mathcal{P}, \nu^k} [\beta_h^{r,k}(s, a, b)],$$

and we also have

$$\begin{aligned} \left| [\mu_h^k(\cdot|s)]^\top \widehat{r}_h^k(s, \cdot, \cdot) \nu_h^k(\cdot|s) \right| &\leq \left| \sum_a \sum_b \mu_h^k(a|s) \widehat{r}_h^k(s, a, b) \nu_h^k(b|s) \right| \\ &\leq \sum_a \sum_b \mu_h^k(a|s) \cdot |\widehat{r}_h^k(s, a, b)| \cdot \nu_h^k(b|s) \leq 1, \end{aligned}$$

because of  $\widehat{r}_h^k(s, a, b) = \max \{ \widehat{r}_h^k(s, a, b) - \beta_h^{r,k}(s, a, b), 0 \} \leq \widehat{r}_h^k(s, a, b) \leq 1$ . Therefore, with probability at least  $1 - \delta$ , we have

$$\text{Term(I)} \leq 2 \sum_{h=1}^H \mathbb{E}_{\mu^k, \mathcal{P}, \nu^k} [\beta_h^{r,k}(s_h, a_h, b_h)] + \sum_{h=1}^H \sum_{s \in \mathcal{S}} \left| q_h^{\mu^k, \mathcal{P}}(s) - q_h^{\mu^k, \widehat{\mathcal{P}}^k}(s) \right|. \quad (49)$$

Next, we bound Term(II) in the following way

$$\begin{aligned} \text{Term(II)} &= \sum_{h=1}^H \sum_{s \in \mathcal{S}} q_h^{\mu^k, \widehat{\mathcal{P}}^k}(s) [\mu_h^k(\cdot|s)]^\top \widehat{r}_h^k(s, \cdot, \cdot) [\nu_h^k(\cdot|s) - \nu_h^*(\cdot|s)] \\ &\quad + \sum_{h=1}^H \sum_{s \in \mathcal{S}} \left[ q_h^{\mu^k, \widehat{\mathcal{P}}^k}(s) - q_h^{\mu^k, \mathcal{P}}(s) \right] [\mu_h^k(\cdot|s)]^\top \widehat{r}_h^k(s, \cdot, \cdot) \nu_h^k(\cdot|s) \\ &\quad + \sum_{h=1}^H \sum_{s \in \mathcal{S}} q_h^{\mu^k, \widehat{\mathcal{P}}^k}(s) [\mu_h^k(\cdot|s)]^\top [\widehat{r}_h^k(s, \cdot, \cdot) - r_h(s, \cdot, \cdot)] \nu_h^k(\cdot|s). \end{aligned}$$

Here the first term in the above equality is associated with the mirror descent step in Algorithm 3. The second term can be similarly bounded by  $\sum_{h=1}^H \sum_{s \in \mathcal{S}} |q_h^{\mu^k, \mathcal{P}}(s) - q_h^{\mu^k, \widehat{\mathcal{P}}^k}(s)|$ . With probability at least  $1 - \delta$ , the third term is bounded as

$$\begin{aligned} &\sum_{h=1}^H \sum_{s \in \mathcal{S}} q_h^{\mu^k, \widehat{\mathcal{P}}^k}(s) [\mu_h^k(\cdot|s)]^\top [\widehat{r}_h^k(s, \cdot, \cdot) - r_h(s, \cdot, \cdot)] \nu_h^k(\cdot|s) \\ &= \sum_{h=1}^H \sum_{s \in \mathcal{S}} q_h^{\mu^k, \widehat{\mathcal{P}}^k}(s) \sum_{a,b} \mu_h^k(a|s) [\widehat{r}_h^k(s, a, b) - r_h(s, a, b)] \nu_h^k(b|s) \\ &= \sum_{h=1}^H \sum_{s \in \mathcal{S}} q_h^{\mu^k, \widehat{\mathcal{P}}^k}(s) \sum_{a,b} \mu_h^k(a|s) \max \{ \widehat{r}_h^{k-1}(s, a, b) - r_h(s, a, b) - \beta_h^{r,k-1}, -r_h(s, a, b) \} \nu_h^k(b|s) \\ &\leq 0, \end{aligned}$$

since  $\widehat{r}_h^{k-1}(s, a, b) - r_h(s, a, b) - \beta_h^{r,k-1} \leq 0$  with probability at least  $1 - \delta$  by Lemma C.4, which reflects the 'optimism' of the algorithm. Thus, with probability at least  $1 - \delta$ , we have

$$\begin{aligned} \text{Term(II)} &\leq \sum_{h=1}^H \sum_{s \in \mathcal{S}} q_h^{\mu^k, \widehat{\mathcal{P}}^k}(s) [\mu_h^k(\cdot|s)]^\top \widehat{r}_h^k(s, \cdot, \cdot) [\nu_h^k(\cdot|s) - \nu_h^*(\cdot|s)] \\ &\quad + \sum_{h=1}^H \sum_{s \in \mathcal{S}} \left| q_h^{\mu^k, \mathcal{P}}(s) - q_h^{\mu^k, \widehat{\mathcal{P}}^k}(s) \right|. \end{aligned} \quad (50)$$

Combining (49), (50) with (48), we obtain that with probability at least  $1 - 2\delta$ , the following inequality holds

$$\begin{aligned} V_1^{\mu^k, \nu^k}(s_1) - V_1^{\mu^*, \nu^*}(s_1) &\leq \sum_{h=1}^H \sum_{s \in \mathcal{S}} q_h^{\mu^k, \widehat{\mathcal{P}}^k}(s) [\mu_h^k(\cdot|s)]^\top \widehat{r}_h^k(s, \cdot, \cdot) [\nu_h^k(\cdot|s) - \nu_h^*(\cdot|s)] \\ &\quad + 2 \sum_{h=1}^H \sum_{s \in \mathcal{S}} \left| q_h^{\mu^k, \mathcal{P}}(s) - q_h^{\mu^k, \widehat{\mathcal{P}}^k}(s) \right| + 2 \sum_{h=1}^H \mathbb{E}_{\mu^k, \mathcal{P}, \nu^k} [\beta_h^{r,k}(s_h, a_h, b_h)]. \end{aligned}$$

This completes our proof.  $\square$

**Lemma C.3.** *With setting  $\eta = \sqrt{\log |\mathcal{A}| / (KH^2)}$ , the mirror ascent steps of Algorithm 2 lead to*

$$\sum_{k=1}^K \sum_{h=1}^H \mathbb{E}_{\mu^*, \mathcal{P}} \left[ \left\langle \mu_h^*(\cdot|s) - \mu_h^k(\cdot|s), U_h^k(s, \cdot) \right\rangle_{\mathcal{A}} \right] \leq \mathcal{O} \left( \sqrt{H^4 K \log |\mathcal{A}|} \right).$$

*Proof.* As shown in (13), the mirror ascent step at the  $k$ -th episode is to solve the following maximization problem

$$\underset{\mu \in \Delta(\mathcal{A} | \mathcal{S}, H)}{\text{maximize}} \sum_{h=1}^H \langle \mu_h(\cdot | s) - \mu_h^k(\cdot | s), U_h^k(s, \cdot) \rangle_{\mathcal{A}} - \frac{1}{\eta} \sum_{h=1}^H D_{\text{KL}}(\mu_h(\cdot | s), \mu_h^k(\cdot | s)),$$

with  $U_h^k(s, a) = \langle \bar{Q}_h^k(s, a, \cdot), \nu_h^k(\cdot | s) \rangle_{\mathcal{B}}$ . We can further equivalently rewrite this maximization problem to a minimization problem as

$$\underset{\mu \in \Delta(\mathcal{A} | \mathcal{S}, H)}{\text{minimize}} - \sum_{h=1}^H \langle \mu_h(\cdot | s) - \mu_h^k(\cdot | s), U_h^k(s, \cdot) \rangle_{\mathcal{A}} + \frac{1}{\eta} \sum_{h=1}^H D_{\text{KL}}(\mu_h(\cdot | s), \mu_h^k(\cdot | s)).$$

Note that the closed-form solution  $\mu_h^{k+1}(a | s) = (Y_h^k)^{-1} \mu_h^k(a | s) \exp\{\eta \langle \bar{Q}_h^k(s, a, \cdot), \nu_h^k(\cdot | s) \rangle_{\mathcal{B}}\}$  to this minimization problem is guaranteed to stay in the relative interior of its feasible set  $\Delta(\mathcal{A} | \mathcal{S}, H)$  when initialize  $\mu_h^0(\cdot | s) = \mathbf{1}/|\mathcal{A}|$ . Thus, we can apply Lemma C.12 and obtain that for any  $\mu = \{\mu_h\}_{h=1}^H$ , the following inequality holds

$$\begin{aligned} & -\eta \langle \mu_h^{k+1}(\cdot | s), U_h^k(s, \cdot) \rangle_{\mathcal{A}} + \eta \langle \mu_h(\cdot | s), U_h^k(s, \cdot) \rangle_{\mathcal{A}} \\ & \leq D_{\text{KL}}(\mu_h(\cdot | s), \mu_h^k(\cdot | s)) - D_{\text{KL}}(\mu_h(\cdot | s), \mu_h^{k+1}(\cdot | s)) - D_{\text{KL}}(\mu_h^{k+1}(\cdot | s), \mu_h^k(\cdot | s)). \end{aligned}$$

Then, by rearranging the terms, we have

$$\begin{aligned} & \eta \langle \mu_h^*(\cdot | s) - \mu_h^k(\cdot | s), U_h^k(s, \cdot) \rangle_{\mathcal{A}} \\ & \leq D_{\text{KL}}(\mu_h^*(\cdot | s), \mu_h^k(\cdot | s)) - D_{\text{KL}}(\mu_h^*(\cdot | s), \mu_h^{k+1}(\cdot | s)) - D_{\text{KL}}(\mu_h^{k+1}(\cdot | s), \mu_h^k(\cdot | s)) \\ & \quad + \eta \langle \mu_h^{k+1}(\cdot | s) - \mu_h^k(\cdot | s), U_h^k(s, \cdot) \rangle_{\mathcal{A}}. \end{aligned} \tag{51}$$

Due to Pinsker's inequality, we have

$$-D_{\text{KL}}(\mu_h^{k+1}(\cdot | s), \mu_h^k(\cdot | s)) \leq -\frac{1}{2} \|\mu_h^{k+1}(\cdot | s) - \mu_h^k(\cdot | s)\|_1^2.$$

Moreover, by Cauchy-Schwarz inequality, we have

$$\eta \langle \mu_h^{k+1}(\cdot | s) - \mu_h^k(\cdot | s), U_h^k(s, \cdot) \rangle_{\mathcal{A}} \leq \eta H \|\mu_h^{k+1}(\cdot | s) - \mu_h^k(\cdot | s)\|_1.$$

Thus, we have

$$\begin{aligned} & -D_{\text{KL}}(\mu_h^{k+1}(\cdot | s), \mu_h^k(\cdot | s)) + \eta \langle \mu_h^{k+1}(\cdot | s) - \mu_h^k(\cdot | s), U_h^k(s, \cdot) \rangle_{\mathcal{A}} \\ & \leq -\frac{1}{2} \|\mu_h^{k+1}(\cdot | s) - \mu_h^k(\cdot | s)\|_1^2 + \eta H \|\mu_h^{k+1}(\cdot | s) - \mu_h^k(\cdot | s)\|_1 \\ & \leq \frac{1}{2} \eta^2 H^2, \end{aligned} \tag{52}$$

where the last inequality is by viewing  $\|\mu_h^{k+1}(\cdot | s) - \mu_h^k(\cdot | s)\|_1$  as a variable  $x$  and finding the maximal value of  $-1/2 \cdot x^2 + \eta H x$  to obtain the upper bound  $1/2 \cdot \eta^2 H^2$ .

Thus, combing (52) with (51), the policy improvement step in Algorithm 2 implies

$$\eta \langle \mu_h^*(\cdot | s) - \mu_h^k(\cdot | s), U_h^k(s, \cdot) \rangle_{\mathcal{A}} \leq D_{\text{KL}}(\mu_h^*(\cdot | s), \mu_h^k(\cdot | s)) - D_{\text{KL}}(\mu_h^*(\cdot | s), \mu_h^{k+1}(\cdot | s)) + \frac{1}{2} \eta^2 H^2,$$

which further leads to

$$\begin{aligned} & \sum_{h=1}^H \mathbb{E}_{\mu^*, \mathcal{P}} \left[ \langle \mu_h^*(\cdot | s) - \mu_h^k(\cdot | s), U_h^k(s, \cdot) \rangle_{\mathcal{A}} \right] \\ & \leq \frac{1}{\eta} \sum_{h=1}^H \mathbb{E}_{\mu^*, \mathcal{P}} \left[ D_{\text{KL}}(\mu_h^*(\cdot | s), \mu_h^k(\cdot | s)) - D_{\text{KL}}(\mu_h^*(\cdot | s), \mu_h^{k+1}(\cdot | s)) \right] + \frac{1}{2} \eta H^3. \end{aligned}$$

Moreover, we take summation from  $k = 1$  to  $K$  of both sides and then obtain

$$\begin{aligned} & \sum_{k=1}^K \sum_{h=1}^H \mathbb{E}_{\mu^*, \mathcal{P}} \left[ \left\langle \mu_h^*(\cdot|s) - \mu_h^k(\cdot|s), U_h^k(s, \cdot) \right\rangle_{\mathcal{A}} \right] \\ & \leq \frac{1}{\eta} \sum_{h=1}^H \mathbb{E}_{\mu^*, \mathcal{P}} \left[ D_{\text{KL}}(\mu_h^*(\cdot|s), \mu_h^1(\cdot|s)) - D_{\text{KL}}(\mu_h^*(\cdot|s), \mu_h^{K+1}(\cdot|s)) \right] + \frac{1}{2} \eta K H^3 \\ & \leq \frac{1}{\eta} \sum_{h=1}^H \mathbb{E}_{\mu^*, \mathcal{P}} \left[ D_{\text{KL}}(\mu_h^*(\cdot|s), \mu_h^1(\cdot|s)) \right] + \frac{1}{2} \eta K H^3, \end{aligned}$$

where the last inequality is non-negativity of KL divergence. By the initialization in Algorithm 2, it is guaranteed that  $\mu_h^1(\cdot|s) = \mathbf{1}/|\mathcal{A}|$ , which thus leads to  $D_{\text{KL}}(\mu_h^*(\cdot|s), \mu_h^1(\cdot|s)) \leq \log |\mathcal{A}|$ . Then, with setting  $\eta = \sqrt{\log |\mathcal{A}|/(KH^2)}$ , we bound the last term as

$$\frac{1}{\eta} \sum_{h=1}^H \mathbb{E}_{\mu^*, \mathcal{P}} \left[ D_{\text{KL}}(\mu_h^*(\cdot|s), \mu_h^1(\cdot|s)) \right] + \frac{1}{2} \eta K H^3 \leq \mathcal{O} \left( \sqrt{H^4 K \log |\mathcal{A}|} \right),$$

which gives

$$\sum_{k=1}^K \sum_{h=1}^H \mathbb{E}_{\mu^*, \mathcal{P}} \left[ \left\langle \mu_h^*(\cdot|s) - \mu_h^k(\cdot|s), U_h^k(s, \cdot) \right\rangle_{\mathcal{A}} \right] \leq \mathcal{O} \left( \sqrt{H^4 K \log |\mathcal{A}|} \right),$$

This completes the proof.  $\square$

**Lemma C.4.** For any  $k \in [K]$ ,  $h \in [H]$  and all  $(s, a, b) \in \mathcal{S} \times \mathcal{A} \times \mathcal{B}$ , with probability at least  $1 - \delta$ , we have

$$|\widehat{r}_h^k(s, a, b) - r_h(s, a, b)| \leq \sqrt{\frac{4 \log(|\mathcal{S}||\mathcal{A}||\mathcal{B}|HK/\delta)}{\max\{N_h^k(s, a, b), 1\}}}.$$

*Proof.* The proof for this theorem is a direct application of Hoeffding's inequality. For  $k \geq 1$ , the definition of  $\widehat{r}_h^k$  in (11) indicates that  $\widehat{r}_h^k(s, a, b)$  is the average of  $N_h^k(s, a, b)$  samples of the observed rewards at  $(s, a, b)$  if  $N_h^k(s, a, b) > 0$ . Then, for fixed  $k \in [K]$ ,  $h \in [H]$  and state-action tuple  $(s, a, b) \in \mathcal{S} \times \mathcal{A} \times \mathcal{B}$ , when  $N_h^k(s, a, b) > 0$ , according to Hoeffding's inequality, with probability at least  $1 - \delta'$  where  $\delta' \in (0, 1]$ , we have

$$|\widehat{r}_h^k(s, a, b) - r_h(s, a, b)| \leq \sqrt{\frac{\log(2/\delta')}{2N_h^k(s, a, b)}},$$

where we also use the facts that the observed rewards  $r_h^k \in [0, 1]$  for all  $k$  and  $h$ , and  $\mathbb{E}[\widehat{r}_h^k] = r_h$  for all  $k$  and  $h$ . For the case where  $N_h^k(s, a, b) = 0$ , by (11), we know  $\widehat{r}_h^k(s, a, b) = 0$  such that  $|\widehat{r}_h^k(s, a, b) - r_h(s, a, b)| = |r_h(s, a, b)| \leq 1$ . On the other hand, we have  $\sqrt{2 \log(2/\delta')} \geq 1 > |\widehat{r}_h^k(s, a, b) - r_h(s, a, b)|$ . Thus, combining the above results, with probability at least  $1 - \delta'$ , for fixed  $k \in [K]$ ,  $h \in [H]$  and state-action tuple  $(s, a, b) \in \mathcal{S} \times \mathcal{A} \times \mathcal{B}$ , we have

$$|\widehat{r}_h^k(s, a, b) - r_h(s, a, b)| \leq \sqrt{\frac{2 \log(2/\delta')}{\max\{N_h^k(s, a, b), 1\}}}.$$

Moreover, by the union bound, letting  $\delta = |\mathcal{S}||\mathcal{A}||\mathcal{B}|HK\delta'/2$ , assuming  $K > 1$ , with probability at least  $1 - \delta$ , for any  $k \in [K]$ ,  $h \in [H]$  and any state-action tuple  $(s, a, b) \in \mathcal{S} \times \mathcal{A} \times \mathcal{B}$ , we have

$$|\widehat{r}_h^k(s, a, b) - r_h(s, a, b)| \leq \sqrt{\frac{4 \log(|\mathcal{S}||\mathcal{A}||\mathcal{B}|HK/\delta)}{\max\{N_h^k(s, a, b), 1\}}}.$$

This completes the proof.  $\square$

In (12), we set  $\beta_h^{r,k}(s, a, b) = \sqrt{\frac{4 \log(|\mathcal{S}||\mathcal{A}||\mathcal{B}|HK/\delta)}{\max\{N_h^k(s, a, b), 1\}}}$ , which equals the bound in Lemma C.4.

**Lemma C.5.** For any  $k \in [K]$ ,  $h \in [H]$  and all  $(s, a) \in \mathcal{S} \times \mathcal{A}$ , with probability at least  $1 - \delta$ , we have

$$\left\| \widehat{\mathcal{P}}_h^k(\cdot | s, a) - \mathcal{P}_h(\cdot | s, a) \right\|_1 \leq \sqrt{\frac{2|\mathcal{S}| \log(|\mathcal{S}||\mathcal{A}|HK/\delta)}{\max\{N_h^k(s, a), 1\}}}.$$

*Proof.* For  $k \geq 1$ , we have  $\|\widehat{\mathcal{P}}_h^k(\cdot | s, a) - \mathcal{P}_h(\cdot | s, a)\|_1 = \max_{\|\mathbf{z}\|_\infty \leq 1} \langle \widehat{\mathcal{P}}_h^k(\cdot | s, a) - \mathcal{P}_h(\cdot | s, a), \mathbf{z} \rangle_{\mathcal{S}}$  by the duality. We construct an  $\varepsilon$ -covering net for the set  $\{\mathbf{z} \in \mathbb{R}^{|\mathcal{S}|} : \|\mathbf{z}\|_\infty \leq 1\}$  with the distance induced by  $\|\cdot\|_\infty$ , denoted as  $\mathcal{N}_\varepsilon$ , such that for any  $\mathbf{z} \in \mathbb{R}^{|\mathcal{S}|}$ , there always exists  $\mathbf{z}' \in \mathcal{N}_\varepsilon$  satisfying  $\|\mathbf{z} - \mathbf{z}'\|_\infty \leq \varepsilon$ . The covering number is  $|\mathcal{N}_\varepsilon| = 1/\varepsilon^{|\mathcal{S}|}$ . Thus, we know that for any  $(s, a) \in \mathcal{S} \times \mathcal{A}$  and any  $\mathbf{z}$  with  $\|\mathbf{z}\|_\infty \leq 1$ , there exists  $\mathbf{z}' \in \mathcal{N}_\varepsilon$  such that  $\|\mathbf{z}' - \mathbf{z}\|_\infty \leq \varepsilon$  and

$$\begin{aligned} & \langle \widehat{\mathcal{P}}_h^k(\cdot | s, a) - \mathcal{P}_h(\cdot | s, a), \mathbf{z} \rangle_{\mathcal{S}} \\ &= \langle \widehat{\mathcal{P}}_h^k(\cdot | s, a) - \mathcal{P}_h(\cdot | s, a), \mathbf{z}' \rangle_{\mathcal{S}} + \langle \widehat{\mathcal{P}}_h^k(\cdot | s, a) - \mathcal{P}_h(\cdot | s, a), \mathbf{z} - \mathbf{z}' \rangle_{\mathcal{S}} \\ &\leq \langle \widehat{\mathcal{P}}_h^k(\cdot | s, a) - \mathcal{P}_h(\cdot | s, a), \mathbf{z}' \rangle_{\mathcal{S}} + \varepsilon \left\| \widehat{\mathcal{P}}_h^k(\cdot | s, a) - \mathcal{P}_h(\cdot | s, a) \right\|_1, \end{aligned}$$

such that we further have

$$\begin{aligned} & \left\| \widehat{\mathcal{P}}_h^k(\cdot | s, a) - \mathcal{P}_h(\cdot | s, a) \right\|_1 \\ &= \max_{\|\mathbf{z}\|_\infty \leq 1} \langle \widehat{\mathcal{P}}_h^k(\cdot | s, a) - \mathcal{P}_h(\cdot | s, a), \mathbf{z} \rangle_{\mathcal{S}} \\ &\leq \max_{\mathbf{z}' \in \mathcal{N}_\varepsilon} \langle \widehat{\mathcal{P}}_h^k(\cdot | s, a) - \mathcal{P}_h(\cdot | s, a), \mathbf{z}' \rangle_{\mathcal{S}} + \varepsilon \left\| \widehat{\mathcal{P}}_h^k(\cdot | s, a) - \mathcal{P}_h(\cdot | s, a) \right\|_1. \end{aligned} \quad (53)$$

By Hoeffding's inequality and union bound over all  $\mathbf{z}' \in \mathcal{N}_\varepsilon$ , when  $N_h^k(s, a) > 0$ , with probability at least  $1 - \delta'$  where  $\delta' \in (0, 1]$ ,

$$\max_{\mathbf{z}' \in \mathcal{N}_\varepsilon} \langle \widehat{\mathcal{P}}_h^k(\cdot | s, a) - \mathcal{P}_h(\cdot | s, a), \mathbf{z}' \rangle_{\mathcal{S}} \leq \sqrt{\frac{|\mathcal{S}| \log(1/\varepsilon) + \log(1/\delta')}{2N_h^k(s, a)}}. \quad (54)$$

Letting  $\varepsilon = 1/2$ , by (53) and (54), with probability at least  $1 - \delta'$ , we have

$$\left\| \widehat{\mathcal{P}}_h^k(\cdot | s, a) - \mathcal{P}_h(\cdot | s, a) \right\|_1 \leq 1 \sqrt{\frac{|\mathcal{S}| \log 2 + \log(1/\delta')}{2N_h^k(s, a)}}.$$

When  $N_h^k(s, a) = 0$ , we have  $\left\| \widehat{\mathcal{P}}_h^k(\cdot | s, a) - \mathcal{P}_h(\cdot | s, a) \right\|_1 = \|\mathcal{P}_h(\cdot | s, a)\|_1 = 1$  such that  $2\sqrt{\frac{|\mathcal{S}| \log 2 + \log(1/\delta')}{2}} > 1 = \left\| \widehat{\mathcal{P}}_h^k(\cdot | s, a) - \mathcal{P}_h(\cdot | s, a) \right\|_1$  always holds. Thus, with probability at least  $1 - \delta'$ ,

$$\left\| \widehat{\mathcal{P}}_h^k(\cdot | s, a) - \mathcal{P}_h(\cdot | s, a) \right\|_1 \leq 2 \sqrt{\frac{|\mathcal{S}| \log 2 + \log(1/\delta')}{2 \max\{N_h^k(s, a), 1\}}} \leq \sqrt{\frac{2|\mathcal{S}| \log(2/\delta')}{\max\{N_h^k(s, a), 1\}}}.$$

Then, by union bound, assuming  $K > 1$ , letting  $\delta = |\mathcal{S}||\mathcal{A}|HK\delta'/2$ , with probability at least  $1 - \delta$ , for any  $(s, a) \in \mathcal{S} \times \mathcal{A}$  and any  $h \in [H]$  and  $k \in [K]$ , we have

$$\left\| \widehat{\mathcal{P}}_h^k(\cdot | s, a) - \mathcal{P}_h(\cdot | s, a) \right\|_1 \leq \sqrt{\frac{2|\mathcal{S}| \log(|\mathcal{S}||\mathcal{A}|HK/\delta)}{\max\{N_h^k(s, a), 1\}}},$$

This completes the proof.  $\square$

In (12), we set  $\beta_h^{\mathcal{P},k}(a, b) = \sqrt{\frac{2H^2|\mathcal{S}| \log(|\mathcal{S}||\mathcal{A}|HK/\delta)}{\max\{N_h^k(s, a), 1\}}}$ , which equals the product of the upper bound in Lemma C.5 and the factor  $H$ .

**Lemma C.6.** *With probability at least  $1 - 2\delta$ , Algorithm 2 ensures that*

$$\sum_{k=1}^K \sum_{h=1}^H \mathbb{E}_{\mu^*, \mathcal{P}, \nu^k} [\bar{\zeta}_h^k(s_h, a_h, b_h) \mid s_1] \leq 0.$$

*Proof.* We prove the upper bound of the model prediction error term. We can decompose the instantaneous prediction error at the  $h$ -step of the  $k$ -th episode as

$$\bar{\zeta}_h^k(s, a, b) = r_h(s, a, b) + \langle \mathcal{P}_h(\cdot \mid s, a), \bar{V}_{h+1}^k(\cdot) \rangle_{\mathcal{S}} - \bar{Q}_h^k(s, a, b), \quad (55)$$

where the equality is by the definition of the prediction error in (36). By plugging in the definition of  $\bar{Q}_h^k$  in Line (2) of Algorithm 2, for any  $(s, a, b)$ , we bound the following term as

$$\begin{aligned} & r_h(s, a, b) + \langle \mathcal{P}_h(\cdot \mid s, a), \bar{V}_{h+1}^k(\cdot) \rangle_{\mathcal{S}} - \bar{Q}_h^k(s, a, b) \\ & \leq r_h(s, a, b) + \langle \mathcal{P}_h(\cdot \mid s, a), \bar{V}_{h+1}^k(\cdot) \rangle_{\mathcal{S}} - \min \left\{ \hat{r}_h^k(s, a, b) + \langle \hat{\mathcal{P}}_h^k(\cdot \mid s, a), \bar{V}_{h+1}^k(\cdot) \rangle_{\mathcal{S}} - \beta_h^k, H - h + 1 \right\} \\ & \leq \max \left\{ r_h(s, a, b) - \hat{r}_h^k(s, a, b) + \langle \mathcal{P}_h(\cdot \mid s, a) - \hat{\mathcal{P}}_h^k(\cdot \mid s, a), \bar{V}_{h+1}^k(\cdot) \rangle_{\mathcal{S}} - \beta_h^k, 0 \right\}, \end{aligned} \quad (56)$$

where the inequality holds because

$$\begin{aligned} & r_h(s, a, b) + \langle \mathcal{P}_h(\cdot \mid s_h, a_h), \bar{V}_{h+1}^k(\cdot) \rangle_{\mathcal{S}} \\ & \leq r_h(s, a, b) + \|\mathcal{P}_h(\cdot \mid s_h, a_h)\|_1 \|\bar{V}_{h+1}^k(\cdot)\|_{\infty} \leq 1 + \max_{s' \in \mathcal{S}} |\bar{V}_{h+1}^k(s')| \leq 1 + H - h, \end{aligned}$$

since  $\|\mathcal{P}_h(\cdot \mid s_h, a_h)\|_1 = 1$  and also the truncation step as shown in Line 2 of Algorithm 2 for  $\bar{Q}_{h+1}^k$  such that for any  $s' \in \mathcal{S}$

$$\begin{aligned} |\bar{V}_{h+1}^k(s')| &= \left| [\mu_{h+1}^k(\cdot \mid s')]^\top \bar{Q}_{h+1}^k(s', \cdot, \cdot) \nu_{h+1}^k(\cdot \mid s') \right| \\ &\leq \|\mu_{h+1}^k(\cdot \mid s')\|_1 \|\bar{Q}_{h+1}^k(s', \cdot, \cdot) \nu_{h+1}^k(\cdot \mid s')\|_{\infty} \\ &\leq \max_{a, b} |\bar{Q}_{h+1}^k(s', a, b)| \\ &\leq H - h. \end{aligned} \quad (57)$$

Combining (55) and (56) gives

$$\bar{\zeta}_h^k(s, a, b) \leq \max \left\{ r_h(s, a, b) - \hat{r}_h^k(s, a, b) + \langle \mathcal{P}_h(\cdot \mid s, a) - \hat{\mathcal{P}}_h^k(\cdot \mid s, a), \bar{V}_{h+1}^k(\cdot) \rangle_{\mathcal{S}} - \beta_h^k, 0 \right\}. \quad (58)$$

Note that as shown in (12), we have

$$\beta_h^k(s, a, b) = \beta_h^{r,k}(s, a, b) + \beta_h^{\mathcal{P},k}(s, a).$$

Then, with probability at least  $1 - \delta$ , we have

$$\begin{aligned} & r_h(s, a, b) - \hat{r}_h^k(s, a, b) - \beta_h^{r,k}(s, a, b) \\ & \leq |r_h(s, a, b) - \hat{r}_h^k(s, a, b)| - \beta_h^{r,k}(s, a, b) \\ & \leq \beta_h^{r,k}(s, a, b) - \beta_h^{r,k}(s, a, b) = 0, \end{aligned}$$

where the last inequality is by Lemma C.4 and the setting of the bonus for the reward. Moreover, with probability at least  $1 - \delta$ , we have

$$\begin{aligned} & \langle \mathcal{P}_h(\cdot \mid s, a) - \hat{\mathcal{P}}_h^k(\cdot \mid s, a), \bar{V}_{h+1}^k(\cdot) \rangle_{\mathcal{S}} - \beta_h^{\mathcal{P},k}(s, a) \\ & \leq \|\mathcal{P}_h(\cdot \mid s, a) - \hat{\mathcal{P}}_h^k(\cdot \mid s, a)\|_1 \|\bar{V}_{h+1}^k(\cdot)\|_{\infty} - \beta_h^{\mathcal{P},k}(s, a) \\ & \leq H \|\mathcal{P}_h(\cdot \mid s, a) - \hat{\mathcal{P}}_h^k(\cdot \mid s, a)\|_1 - \beta_h^{\mathcal{P},k}(s, a) \\ & \leq \beta_h^{\mathcal{P},k}(s, a) - \beta_h^{\mathcal{P},k}(s, a) = 0, \end{aligned}$$

where the first inequality is by Cauchy-Schwarz inequality, the second inequality is due to  $\max_{s' \in \mathcal{S}} \|\bar{V}_{h+1}^k(s')\|_\infty \leq H$  as shown in (57), and the last inequality is by the setting of  $\beta_h^{\mathcal{P},k}$  and also Lemma C.5. Thus, with probability at least  $1 - 2\delta$ , the following inequality holds

$$r_h(s, a, b) - \hat{r}_h^k(s, a, b) + \langle \mathcal{P}_h(\cdot | s, a) - \hat{\mathcal{P}}_h^k(\cdot | s, a), \bar{V}_{h+1}^k(\cdot) \rangle_{\mathcal{S}} - \beta_h^k(s, a, b) \leq 0.$$

Combining the above inequality with (58), we have that with probability at least  $1 - 2\delta$ , for any  $h \in [H]$  and  $k \in [K]$ , the following inequality holds

$$\bar{\zeta}_h^k(s, a, b) \leq 0, \quad \forall (s, a, b) \in \mathcal{S} \times \mathcal{A} \times \mathcal{B},$$

which leads to

$$\sum_{k=1}^K \sum_{h=1}^H \mathbb{E}_{\mu^*, \mathcal{P}, \nu^k} [\bar{\zeta}_h^k(s_h, a_h, b_h) | s_1] \leq 0.$$

This completes the proof.  $\square$

**Lemma C.7.** *With probability at least  $1 - \delta$ , Algorithm 2 ensures that*

$$\sum_{k=1}^K \bar{V}_1^k(s_1) - \sum_{k=1}^K V_1^{\mu^k, \nu^k}(s_1) \leq \tilde{O} \left( \sqrt{|\mathcal{S}|^2 |\mathcal{A}| H^4 K} + \sqrt{|\mathcal{S}| |\mathcal{A}| |\mathcal{B}| H^2 K} \right).$$

*Proof.* We assume that a trajectory  $\{(s_h^k, a_h^k, b_h^k, s_{h+1}^k)\}_{h=1}^H$  for all  $k \in [K]$  is generated according to the policies  $\mu^k, \nu^k$ , and the true transition model  $\mathcal{P}$ . Thus, we expand the bias term at the  $h$ -th step of the  $k$ -th episode, which is

$$\begin{aligned} & \bar{V}_h^k(s_h^k) - V_h^{\mu^k, \nu^k}(s_h^k) \\ &= [\mu_h^k(\cdot | s_h^k)]^\top [\bar{Q}_h^k(s_h^k, \cdot, \cdot) - Q_h^{\mu^k, \nu^k}(s_h^k, \cdot, \cdot)] \nu_h^k(\cdot | s_h^k) \\ &= \zeta_h^k + \bar{Q}_h^k(s_h^k, a_h^k, b_h^k) - Q_h^{\mu^k, \nu^k}(s_h^k, a_h^k, b_h^k) \\ &= \zeta_h^k + \langle \mathcal{P}_h(\cdot | s_h^k, a_h^k), \bar{V}_{h+1}^k(\cdot) - V_{h+1}^{\mu^k, \nu^k}(\cdot) \rangle_{\mathcal{S}} - \bar{\zeta}_h^k(s_h^k, a_h^k, b_h^k) \\ &= \zeta_h^k + \xi_h^k + \bar{V}_{h+1}^k(s_{h+1}^k) - V_{h+1}^{\mu^k, \nu^k}(s_{h+1}^k) - \bar{\zeta}_h^k(s_h^k, a_h^k, b_h^k), \end{aligned} \quad (59)$$

where the first equality is by Line 2 of Algorithm 2 and (1), the third equality is by plugging in (2) and (36). Specifically, in the above equality, we introduce two martingale difference sequence, namely,  $\{\zeta_h^k\}_{h \geq 0, k \geq 0}$  and  $\{\xi_h^k\}_{h \geq 0, k \geq 0}$ , which are defined as

$$\begin{aligned} \zeta_h^k &:= [\mu_h^k(\cdot | s_h^k)]^\top [\bar{Q}_h^k(s_h^k, \cdot, \cdot) - Q_h^{\mu^k, \nu^k}(s_h^k, \cdot, \cdot)] \nu_h^k(\cdot | s_h^k) - [\bar{Q}_h^k(s_h^k, a_h^k, b_h^k) - Q_h^{\mu^k, \nu^k}(s_h^k, a_h^k, b_h^k)], \\ \xi_h^k &:= \langle \mathcal{P}_h(\cdot | s_h^k, a_h^k), \bar{V}_{h+1}^k(\cdot) - V_{h+1}^{\mu^k, \nu^k}(\cdot) \rangle_{\mathcal{S}} - [\bar{V}_{h+1}^k(s_{h+1}^k) - V_{h+1}^{\mu^k, \nu^k}(s_{h+1}^k)], \end{aligned}$$

such that

$$\mathbb{E}_{a_h^k \sim \mu_h^k(\cdot | s_h^k), b_h^k \sim \nu_h^k(\cdot | s_h^k)} [\zeta_h^k | \mathcal{F}_h^k] = 0, \quad \mathbb{E}_{s_{h+1}^k \sim \mathcal{P}_h(\cdot | s_h^k, a_h^k)} [\xi_h^k | \tilde{\mathcal{F}}_h^k] = 0,$$

with  $\mathcal{F}_h^k$  being the filtration of all randomness up to  $(h-1)$ -th step of the  $k$ -th episode plus  $s_h^k$ , and  $\tilde{\mathcal{F}}_h^k$  being the filtration of all randomness up to  $(h-1)$ -th step of the  $k$ -th episode plus  $s_h^k, a_h^k, b_h^k$ .

We can observe that the equality (59) construct a recursion for  $\bar{V}_h^k(s_h^k) - V_h^{\mu^k, \nu^k}(s_h^k)$ . Moreover, we also have  $\bar{V}_{H+1}^k(\cdot) = \mathbf{0}$  and  $V_{H+1}^{\mu^k, \nu^k}(\cdot) = \mathbf{0}$ . Thus, recursively apply (59) from  $h = 1$  to  $H$  leads to the following equality

$$\bar{V}_1^k(s_1) - V_1^{\mu^k, \nu^k}(s_1) = \sum_{h=1}^H \zeta_h^k + \sum_{h=1}^H \xi_h^k - \sum_{h=1}^H \bar{\zeta}_h^k(s_h^k, a_h^k, b_h^k). \quad (60)$$

Moreover, by (36) and Line 2 of Algorithm 2, we have

$$\begin{aligned} -\bar{\zeta}_h^k(s_h^k, a_h^k, b_h^k) &= -r_h(s_h^k, a_h^k, b_h^k) - \langle \mathcal{P}_h(\cdot | s_h, a_h), \bar{V}_{h+1}^k(\cdot) \rangle_{\mathcal{S}} \\ &\quad + \min \{ \hat{r}_h^k(s_h^k, a_h^k, b_h^k) + \langle \hat{\mathcal{P}}_h^k(\cdot | s_h, a_h), \bar{V}_{h+1}^k(\cdot) \rangle_{\mathcal{S}} + \beta_h^k(s_h^k, a_h^k, b_h^k), H - h + 1 \}. \end{aligned}$$

Then, we can further bound  $-\bar{\zeta}_h^k(s_h^k, a_h^k, b_h^k)$  as follows

$$\begin{aligned} -\bar{\zeta}_h^k(s_h^k, a_h^k, b_h^k) &\leq -r_h(s_h^k, a_h^k, b_h^k) - \langle \mathcal{P}_h(\cdot | s_h^k, a_h^k), \bar{V}_{h+1}^k(\cdot) \rangle_{\mathcal{S}} + \hat{r}_h^k(s_h^k, a_h^k, b_h^k) \\ &\quad + \langle \hat{\mathcal{P}}_h^k(\cdot | s_h^k, a_h^k), \bar{V}_{h+1}^k(\cdot) \rangle_{\mathcal{S}} + \beta_h^k(s_h^k, a_h^k, b_h^k) \\ &\leq |\hat{r}_h^k(s_h^k, a_h^k, b_h^k) - r_h(s_h^k, a_h^k, b_h^k)| \\ &\quad + \left| \langle \mathcal{P}_h(\cdot | s_h^k, a_h^k) - \hat{\mathcal{P}}_h^k(\cdot | s_h^k, a_h^k), \bar{V}_{h+1}^k(\cdot) \rangle_{\mathcal{S}} \right| + \beta_h^k(s_h^k, a_h^k, b_h^k), \end{aligned}$$

where the first inequality is due to  $\min\{x, y\} \leq x$ . Additionally, we have

$$\begin{aligned} &\left| \langle \mathcal{P}_h(\cdot | s_h^k, a_h^k) - \hat{\mathcal{P}}_h^k(\cdot | s_h^k, a_h^k), \bar{V}_{h+1}^k(\cdot) \rangle_{\mathcal{S}} \right| \\ &\leq \|\bar{V}_{h+1}^k(\cdot)\|_{\infty} \|\mathcal{P}_h(\cdot | s_h^k, a_h^k) - \hat{\mathcal{P}}_h^k(\cdot | s_h^k, a_h^k)\|_1 \\ &\leq H \|\mathcal{P}_h(\cdot | s_h^k, a_h^k) - \hat{\mathcal{P}}_h^k(\cdot | s_h^k, a_h^k)\|_1, \end{aligned}$$

where the first inequality is by Cauchy-Schwarz inequality and the second inequality is by (57). Thus, putting the above together, we obtain

$$\begin{aligned} -\bar{\zeta}_h^k(s_h^k, a_h^k, b_h^k) &\leq |\hat{r}_h^k(s_h^k, a_h^k, b_h^k) - r_h(s_h^k, a_h^k, b_h^k)| + H \|\bar{V}_{h+1}^k(\cdot) - \bar{V}_{h+1}^k(\cdot)\|_1 + \beta_h^k(s_h^k, a_h^k, b_h^k) \\ &\leq 2\beta_h^{r,k}(s_h^k, a_h^k, b_h^k) + 2\beta_h^{p,k}(s_h^k, a_h^k), \end{aligned}$$

where the second inequality is by Lemma C.4, Lemma C.5, and the decomposition of the bonus term  $\beta_h^k$  as (12). Due to Lemma C.4 and Lemma C.5, by union bound, for any  $h \in [H]$ ,  $k \in [K]$  and  $(s_h, a_h, b_h) \in \mathcal{S} \times \mathcal{A} \times \mathcal{B}$ , the above inequality holds with probability at least  $1 - 2\delta$ . Therefore, by (60), with probability at least  $1 - 2\delta$ , we have

$$\begin{aligned} &\sum_{k=1}^K [\bar{V}_1^k(s_1) - V_1^{\mu^k, \nu^k}(s_1)] \\ &\leq \sum_{k=1}^K \sum_{h=1}^H \zeta_h^k + \sum_{k=1}^K \sum_{h=1}^H \xi_h^k + 2 \sum_{k=1}^K \sum_{h=1}^H \beta_h^{r,k}(s_h^k, a_h^k, b_h^k) + 2 \sum_{k=1}^K \sum_{h=1}^H \beta_h^{p,k}(s_h^k, a_h^k). \end{aligned} \tag{61}$$

By Azuma-Hoeffding inequality, with probability at least  $1 - \delta$ , the following inequalities hold

$$\begin{aligned} \sum_{k=1}^K \sum_{h=1}^H \zeta_h^k &\leq \mathcal{O} \left( \sqrt{H^3 K \log \frac{1}{\delta}} \right), \\ \sum_{k=1}^K \sum_{h=1}^H \xi_h^k &\leq \mathcal{O} \left( \sqrt{H^3 K \log \frac{1}{\delta}} \right), \end{aligned}$$

where we use the facts that  $|\bar{Q}_h^k(s_h^k, a_h^k, b_h^k) - Q_h^{\mu^k, \nu^k}(s_h^k, a_h^k, b_h^k)| \leq 2H$  and  $|\bar{V}_{h+1}^k(s_{h+1}^k) - V_{h+1}^{\mu^k, \nu^k}(s_{h+1}^k)| \leq 2H$ . Next, we need to bound  $\sum_{k=1}^K \sum_{h=1}^H \beta_h^{r,k}(s_h^k, a_h^k, b_h^k)$  and  $\sum_{k=1}^K \sum_{h=1}^H \beta_h^{p,k}(s_h^k, a_h^k)$  in (61). We show that

$$\begin{aligned} \sum_{k=1}^K \sum_{h=1}^H \beta_h^{r,k}(s_h^k, a_h^k, b_h^k) &= C \sum_{k=1}^K \sum_{h=1}^H \sqrt{\frac{\log(|\mathcal{S}||\mathcal{A}||\mathcal{B}|HK/\delta)}{\max\{N_h^k(s_h^k, a_h^k, b_h^k), 1\}}} \\ &= C \sum_{k=1}^K \sum_{h=1}^H \sqrt{\frac{\log(|\mathcal{S}||\mathcal{A}||\mathcal{B}|HK/\delta)}{N_h^k(s_h^k, a_h^k, b_h^k)}} \\ &\leq C \sum_{h=1}^H \sum_{(s,a,b) \in \mathcal{S} \times \mathcal{A} \times \mathcal{B}} \sum_{\substack{N_h^K(s,a,b) \\ N_h^K(s,a,b) > 0}} \sqrt{\frac{\log(|\mathcal{S}||\mathcal{A}||\mathcal{B}|HK/\delta)}{n}}, \end{aligned}$$



where the second equality is because  $(s_h^k, a_h^k, b_h^k)$  is visited such that  $N_h^k(s_h^k, a_h^k, b_h^k) \geq 1$ . In addition, we have

$$\begin{aligned} & \sum_{h=1}^H \sum_{\substack{(s,a,b) \in \mathcal{S} \times \mathcal{A} \times \mathcal{B} \\ N_h^K(s,a,b) > 0}} \sum_{n=1}^{N_h^K(s,a,b)} \sqrt{\frac{\log(|\mathcal{S}||\mathcal{A}||\mathcal{B}|HK/\delta)}{n}} \\ & \leq \sum_{h=1}^H \sum_{(s,a,b) \in \mathcal{S} \times \mathcal{A} \times \mathcal{B}} \mathcal{O} \left( \sqrt{N_h^K(s,a,b) \log \frac{|\mathcal{S}||\mathcal{A}||\mathcal{B}|HK}{\delta}} \right) \\ & \leq \mathcal{O} \left( H \sqrt{K|\mathcal{S}||\mathcal{A}||\mathcal{B}| \log \frac{|\mathcal{S}||\mathcal{A}||\mathcal{B}|HK}{\delta}} \right), \end{aligned}$$

where the last inequality is based on the consideration that  $\sum_{(s,a,b) \in \mathcal{S} \times \mathcal{A} \times \mathcal{B}} N_h^K(s,a,b) = K$  such that  $\sum_{(s,a,b) \in \mathcal{S} \times \mathcal{A} \times \mathcal{B}} \sqrt{N_h^K(s,a,b)} \leq \mathcal{O} \left( \sqrt{K|\mathcal{S}||\mathcal{A}||\mathcal{B}|} \right)$  when  $K$  is sufficiently large. Putting the above together, we obtain

$$\sum_{k=1}^K \sum_{h=1}^H \beta_h^{r,k}(s_h^k, a_h^k, b_h^k) \leq \mathcal{O} \left( H \sqrt{K|\mathcal{S}||\mathcal{A}||\mathcal{B}| \log \frac{|\mathcal{S}||\mathcal{A}||\mathcal{B}|HK}{\delta}} \right).$$

Similarly, we have

$$\begin{aligned} \sum_{k=1}^K \sum_{h=1}^H \beta_h^{p,k}(s_h^k, a_h^k) &= \sum_{k=1}^K \sum_{h=1}^H \sqrt{\frac{H^2 |\mathcal{S}| \log(|\mathcal{S}||\mathcal{A}|HK/\delta)}{\max\{N_h^k(s_h^k, a_h^k), 1\}}} \\ &\leq \sum_{h=1}^H \sum_{(s,a) \in \mathcal{S} \times \mathcal{A}} \mathcal{O} \left( \sqrt{N_h^K(s,a) H^2 |\mathcal{S}| \log \frac{|\mathcal{S}||\mathcal{A}|HK}{\delta}} \right) \\ &\leq \sum_{h=1}^H \sum_{(s,a) \in \mathcal{S} \times \mathcal{A}} \mathcal{O} \left( \sqrt{\sum_{b \in \mathcal{B}} N_h^K(s,a,b) H^2 |\mathcal{S}| \log \frac{|\mathcal{S}||\mathcal{A}|HK}{\delta}} \right) \\ &\leq \mathcal{O} \left( H \sqrt{K|\mathcal{S}|^2 |\mathcal{A}| H^2 \log \frac{|\mathcal{S}||\mathcal{A}|HK}{\delta}} \right), \end{aligned}$$

where the second inequality is due to  $\sum_{b \in \mathcal{B}} N_h^K(s,a,b) = N_h^K(s,a)$ , and the last inequality is based on the consideration that  $\sum_{(s,a,b) \in \mathcal{S} \times \mathcal{A} \times \mathcal{B}} N_h^K(s,a,b) = K$  such that  $\sum_{(s,a) \in \mathcal{S} \times \mathcal{A}} \sqrt{\sum_{b \in \mathcal{B}} N_h^K(s,a,b)} \leq \mathcal{O}(\sqrt{K|\mathcal{S}||\mathcal{A}|})$  when  $K$  is sufficiently large.

Thus, by (61), with probability at least  $1 - \delta$ , we have

$$\sum_{k=1}^K \bar{V}_1^k(s_1) - \sum_{k=1}^K V_1^{\mu^k, \nu^k}(s_1) \leq \tilde{\mathcal{O}}(\sqrt{|\mathcal{S}|^2 |\mathcal{A}| H^4 K} + \sqrt{|\mathcal{S}||\mathcal{A}||\mathcal{B}| H^2 K})$$

where  $\tilde{\mathcal{O}}$  hides logarithm terms. This completes the proof.  $\square$

**Lemma C.8.** With setting  $\gamma = \sqrt{|\mathcal{S}| \log |\mathcal{B}| / K}$ , the mirror descent steps of Algorithm 3 lead to

$$\sum_{k=1}^K \sum_{h=1}^H \sum_{s \in \mathcal{S}} d_h^k(s) \langle W_h^k(s, \cdot), \nu_h^k(\cdot|s) - \nu_h^*(\cdot|s) \rangle \leq \mathcal{O} \left( \sqrt{H^2 |\mathcal{S}| K \log |\mathcal{B}|} \right).$$

*Proof.* Similar to the proof of Lemma C.3, and also by Lemma C.12, for any  $\nu = \{\nu_h\}_{h=1}^H$  and  $s \in \mathcal{S}$ , the mirror descent step in Algorithm 3 leads to

$$\begin{aligned} & \gamma d_h^k(s) \langle W_h^k(s, \cdot), \nu_h^{k+1}(\cdot|s) \rangle_{\mathcal{B}} - \gamma d_h^k(s) \langle W_h^k(s, \cdot), \nu_h(\cdot|s) \rangle_{\mathcal{B}} \\ & \leq D_{\text{KL}}(\nu_h(\cdot|s), \nu_h^k(\cdot|s)) - D_{\text{KL}}(\nu_h(\cdot|s), \nu_h^{k+1}(\cdot|s)) - D_{\text{KL}}(\nu_h^{k+1}(\cdot|s), \nu_h^k(\cdot|s)), \end{aligned}$$

according to (14), where  $W_h^k(s, a) = \langle \nu_h^k(\cdot|s), \widehat{r}_h^k(s, a, \cdot) \rangle$ . Then, by rearranging the terms, we have

$$\begin{aligned} & \gamma d_h^k(s) \langle W_h^k(s, \cdot), \nu_h^k(\cdot|s) - \nu_h^*(\cdot|s) \rangle_{\mathcal{B}} \\ & \leq D_{\text{KL}}(\nu_h^*(\cdot|s), \nu_h^k(\cdot|s)) - D_{\text{KL}}(\nu_h^*(\cdot|s), \nu_h^{k+1}(\cdot|s)) - D_{\text{KL}}(\nu_h^{k+1}(\cdot|s), \nu_h^k(\cdot|s)) \\ & \quad - \gamma d_h^k(s) \langle W_h^k(s, \cdot), \nu_h^{k+1}(\cdot|s) - \nu_h^k(\cdot|s) \rangle_{\mathcal{B}}. \end{aligned} \quad (62)$$

Due to Pinsker's inequality, we have

$$-D_{\text{KL}}(\nu_h^{k+1}(\cdot|s), \nu_h^k(\cdot|s)) \leq -\frac{1}{2} \|\nu_h^{k+1}(\cdot|s) - \nu_h^k(\cdot|s)\|_1^2. \quad (63)$$

Moreover, we have

$$\begin{aligned} & -\gamma d_h^k(s) \langle W_h^k(s, \cdot), \nu_h^k(\cdot|s) - \nu_h^{k+1}(\cdot|s) \rangle_{\mathcal{B}} \\ & \leq \gamma d_h^k(s) \|W_h^k(s, \cdot)\|_{\infty} \|\nu_h^{k+1}(\cdot|s) - \nu_h^k(\cdot|s)\|_1 \\ & \leq \gamma d_h^k(s) \|\nu_h^{k+1}(\cdot|s) - \nu_h^k(\cdot|s)\|_1, \end{aligned} \quad (64)$$

where the last inequality is by

$$\begin{aligned} \|W_h^k(s, \cdot)\|_{\infty} &= \max_{b \in \mathcal{B}} W_h^k(s, b) \\ &\leq \max_{s \in \mathcal{S}, b \in \mathcal{B}} W_h^k(s, b) \\ &\leq \max_{s \in \mathcal{S}, b \in \mathcal{B}} \langle \widehat{r}_h^{k-1}(s, \cdot, b), \mu_h^k(\cdot|s) \rangle \\ &\leq \max_{s \in \mathcal{S}, b \in \mathcal{B}} \|\widehat{r}_h^{k-1}(s, \cdot, b)\|_{\infty} \|\mu_h^k(\cdot|s)\|_1 \leq 1. \end{aligned}$$

due to the definition of  $W_h^k$  and  $\widehat{r}_h^k(s, a, b) = \max\{\widehat{r}_h^k(s, a, b) - \beta_h^{r,k}, 0\} \leq \widehat{r}_h^k(s, a, b) \leq 1$ . Combining (63) and (64) gives

$$\begin{aligned} & -D_{\text{KL}}(\nu_h^{k+1}(\cdot|s), \nu_h^k(\cdot|s)) - \gamma d_h^k(s) \langle W_h^k(s, \cdot), \nu_h^k(\cdot|s) - \nu_h^{k+1}(\cdot|s) \rangle_{\mathcal{B}} \\ & \leq -\frac{1}{2} \|\nu_h^{k+1}(\cdot|s) - \nu_h^k(\cdot|s)\|_1^2 + \gamma d_h^k(s) \|\nu_h^{k+1}(\cdot|s) - \nu_h^k(\cdot|s)\|_1 \\ & \leq \frac{1}{2} [d_h^k(s)]^2 \gamma^2 \leq \frac{1}{2} d_h^k(s) \gamma^2, \end{aligned}$$

where the second inequality is obtained via solving  $\max_x \{-1/2 \cdot x^2 + \gamma d_h^k(s) \cdot x\}$  if letting  $x = \|\nu_h^{k+1}(\cdot|s) - \nu_h^k(\cdot|s)\|_1$ . Plugging the above inequality into (62) gives

$$\gamma d_h^k(s) \langle W_h^k(s, \cdot), \nu_h^k(\cdot|s) - \nu_h^*(\cdot|s) \rangle_{\mathcal{B}} \leq D_{\text{KL}}(\nu_h^*(\cdot|s), \nu_h^k(\cdot|s)) - D_{\text{KL}}(\nu_h^*(\cdot|s), \nu_h^{k+1}(\cdot|s)) + \frac{1}{2} d_h^k(s) \gamma^2.$$

Thus, the policy improvement step implies

$$\begin{aligned} & \sum_{h=1}^H \sum_{s \in \mathcal{S}} d_h^k(s) \langle W_h^k(s, \cdot), \nu_h^k(\cdot|s) - \nu_h^*(\cdot|s) \rangle_{\mathcal{B}} \\ & \leq \frac{1}{\gamma} \sum_{h=1}^H \sum_{s \in \mathcal{S}} [D_{\text{KL}}(\nu_h^*(\cdot|s), \nu_h^k(\cdot|s)) - D_{\text{KL}}(\nu_h^*(\cdot|s), \nu_h^{k+1}(\cdot|s))] + \frac{1}{\gamma} \sum_{h=1}^H \sum_{s \in \mathcal{S}} \frac{1}{2} d_h^k(s) \gamma^2 \\ & \leq \frac{1}{\gamma} \sum_{h=1}^H \sum_{s \in \mathcal{S}} [D_{\text{KL}}(\nu_h^*(\cdot|s), \nu_h^k(\cdot|s)) - D_{\text{KL}}(\nu_h^*(\cdot|s), \nu_h^{k+1}(\cdot|s))] + \frac{1}{2} H \gamma. \end{aligned}$$

Further summing on both sides of the above inequality from  $k = 1$  to  $K$  gives

$$\begin{aligned} & \sum_{k=1}^K \sum_{h=1}^H \sum_{s \in \mathcal{S}} d_h^k(s) \langle W_h^k(s, \cdot), \nu_h^k(\cdot|s) - \nu_h^*(\cdot|s) \rangle_{\mathcal{B}} \\ & \leq \frac{1}{\gamma} \sum_{h=1}^H \sum_{s \in \mathcal{S}} [D_{\text{KL}}(\nu_h^*(\cdot|s), \nu_h^1(\cdot|s)) - D_{\text{KL}}(\nu_h^*(\cdot|s), \nu_h^{K+1}(\cdot|s))] + \frac{1}{2} HK\gamma \\ & \leq \frac{1}{\gamma} \sum_{h=1}^H \sum_{s \in \mathcal{S}} D_{\text{KL}}(\nu_h^*(\cdot|s), \nu_h^1(\cdot|s)) + \frac{1}{2} HK\gamma. \end{aligned}$$

Note that by the initialization in Algorithm 3, it is guaranteed that  $\nu_h^1(\cdot|s) = \mathbf{1}/|\mathcal{B}|$ , which thus leads to  $D_{\text{KL}}(\mu_h^*(\cdot|s), \mu_h^1(\cdot|s)) \leq \log |\mathcal{B}|$ . By setting  $\gamma = \sqrt{|\mathcal{S}| \log |\mathcal{B}| / K}$ , we further bound the term as

$$\frac{1}{\gamma} \sum_{h=1}^H \sum_{s \in \mathcal{S}} D_{\text{KL}}(\nu_h^*(\cdot|s), \nu_h^1(\cdot|s)) + \frac{1}{2} HK\gamma \leq \mathcal{O}\left(\sqrt{H^2 |\mathcal{S}| K \log |\mathcal{B}|}\right),$$

which gives

$$\sum_{k=1}^K \sum_{h=1}^H \sum_{s \in \mathcal{S}} d_h^k(s) \langle W_h^k(s, \cdot), \nu_h^k(\cdot|s) - \nu_h^*(\cdot|s) \rangle_{\mathcal{B}} \leq \mathcal{O}\left(\sqrt{H^2 |\mathcal{S}| K \log |\mathcal{B}|}\right).$$

This completes the proof.  $\square$

Before giving the next lemma, we first present the following definition for the proof of the next lemma.

**Definition C.9** (Confidence Set). *Define the following confidence set for transition models*

$$\begin{aligned} \Upsilon^k := & \left\{ \tilde{\mathcal{P}} : \left| \tilde{\mathcal{P}}_h(s'|s, a) - \hat{\mathcal{P}}_h^k(s'|s, a) \right| \leq \epsilon_h^k, \|\tilde{\mathcal{P}}_h(\cdot|s, a)\|_1 = 1, \right. \\ & \left. \text{and } \tilde{\mathcal{P}}_h(s'|s, a) \geq 0, \forall (s, a, s') \in \mathcal{S} \times \mathcal{A} \times \mathcal{S}, \forall k \in [K] \right\} \end{aligned}$$

where we define

$$\epsilon_h^k := 2\sqrt{\frac{\hat{\mathcal{P}}_h^k(s'|s, a) \log(|\mathcal{S}||\mathcal{A}|HK/\delta')}{\max\{N_h^k(s, a) - 1, 1\}}} + \frac{14 \log(|\mathcal{S}||\mathcal{A}|HK/\delta')}{3 \max\{N_h^k(s, a) - 1, 1\}}$$

with  $N_h^k(s, a) := \sum_{\tau=1}^k \mathbf{1}\{(s, a) = (s_h^\tau, a_h^\tau)\}$ , and  $\hat{\mathcal{P}}^k$  being the empirical transition model.

**Lemma C.10.** *With probability at least  $1 - \delta$ , the difference between  $q^{\mu^k, \mathcal{P}}$  and  $d^k$  are bounded as*

$$\sum_{k=1}^K \sum_{h=1}^H \sum_{s \in \mathcal{S}} \left| q_h^{\mu^k, \mathcal{P}}(s) - d_h^k(s) \right| \leq \tilde{\mathcal{O}}\left(H^2 |\mathcal{S}| \sqrt{|\mathcal{A}| K}\right).$$

*Proof.* By the definition of state distribution, we first have

$$\begin{aligned} \sum_{k=1}^K \sum_{h=1}^H \sum_{s \in \mathcal{S}} \left| q_h^{\mu^k, \mathcal{P}}(s) - d_h^k(s) \right| &= \sum_{k=1}^K \sum_{h=1}^H \sum_{s \in \mathcal{S}} \left| \sum_{a \in \mathcal{A}} w_h^k(s, a) - \sum_{a \in \mathcal{A}} \hat{w}_h^k(s, a) \right| \\ &\leq \sum_{k=1}^K \sum_{h=1}^H \sum_{s \in \mathcal{S}} \sum_{a \in \mathcal{A}} |w_h^k(s, a) - \hat{w}_h^k(s, a)|. \end{aligned}$$

where  $\widehat{w}_h^k(s, a)$  is the occupancy measure under the empirical transition model  $\widehat{\mathcal{P}}^k$  and the policy  $\mu^k$ . Then, since  $\widehat{\mathcal{P}}^k \in \Upsilon^k$  always holds for any  $k$ , by Lemma C.15, we can bound the last term of the bound inequality such that with probability at least  $1 - 6\delta'$ ,

$$\sum_{k=1}^K \sum_{h=1}^H \sum_{s \in \mathcal{S}} \left| q_h^{\mu^k, \mathcal{P}}(s) - d_h^k(s) \right| \leq \mathcal{E}_1 + \mathcal{E}_2.$$

Next, we compute the order of  $\mathcal{E}_1$  by Lemma C.14. With probability at least  $1 - 2\delta'$ , we have

$$\begin{aligned} \mathcal{E}_1 &= \mathcal{O} \left[ \sum_{h=2}^H \sum_{h'=1}^{h-1} \sum_{k=1}^K \sum_{s \in \mathcal{S}} \sum_{a \in \mathcal{A}} w_h^k(s, a) \left( \sqrt{\frac{|\mathcal{S}| \log(|\mathcal{S}| |\mathcal{A}| HK / \delta')}{\max\{N_h^k(s, a), 1\}}} + \frac{\log(|\mathcal{S}| |\mathcal{A}| HK / \delta')}{\max\{N_h^k(s, a), 1\}} \right) \right] \\ &= \mathcal{O} \left[ \sum_{h=2}^H \sum_{h'=1}^{h-1} \sqrt{|\mathcal{S}|} \left( \sqrt{|\mathcal{S}| |\mathcal{A}| K} + |\mathcal{S}| |\mathcal{A}| \log K + \log \frac{H}{\delta'} \right) \log \frac{|\mathcal{S}| |\mathcal{A}| HK}{\delta'} \right] \\ &= \mathcal{O} \left[ \left( H^2 |\mathcal{S}| \sqrt{|\mathcal{A}| K} + H^2 |\mathcal{S}|^{3/2} |\mathcal{A}| \log K + H^2 \sqrt{|\mathcal{S}|} \log \frac{H}{\delta'} \right) \log \frac{|\mathcal{S}| |\mathcal{A}| HK}{\delta'} \right] \\ &= \widetilde{\mathcal{O}} \left( H^2 |\mathcal{S}| \sqrt{|\mathcal{A}| K} \right), \end{aligned}$$

where we ignore  $\log K$  terms when  $K$  is sufficiently large such that  $\sqrt{K}$  dominates, and  $\widetilde{\mathcal{O}}$  hides logarithm dependence on  $|\mathcal{S}|$ ,  $|\mathcal{A}|$ ,  $H$ ,  $K$ , and  $1/\delta'$ . On the other hand,  $\mathcal{E}_2$  also depends on  $\text{poly}(H, |\mathcal{S}|, |\mathcal{A}|)$  except the factor  $\log \frac{|\mathcal{S}| |\mathcal{A}| HK}{\delta'}$  as shown in Lemma C.15. Thus,  $\mathcal{E}_2$  can be ignored comparing to  $\mathcal{E}_1$  if  $K$  is sufficiently large. Therefore, we eventually obtain that with probability at least  $1 - 8\delta'$ , the following inequality holds

$$\sum_{k=1}^K \sum_{h=1}^H \sum_{s \in \mathcal{S}} \left| q_h^{\mu^k, \mathcal{P}}(s) - d_h^k(s) \right| \leq \widetilde{\mathcal{O}} \left( H^2 |\mathcal{S}| \sqrt{|\mathcal{A}| K} \right).$$

We let  $\delta = 8\delta'$  such that  $\log \frac{|\mathcal{S}| |\mathcal{A}| HK}{\delta'} = \log \frac{8|\mathcal{S}| |\mathcal{A}| HK}{\delta}$  without changing the order as shown above. Then, with probability at least  $1 - \delta$ , we have  $\sum_{k=1}^K \sum_{h=1}^H \sum_{s \in \mathcal{S}} \left| q_h^{\mu^k, \mathcal{P}}(s) - d_h^k(s) \right| \leq \widetilde{\mathcal{O}}(H^2 |\mathcal{S}| \sqrt{|\mathcal{A}| K})$ . This completes the proof.  $\square$

**Lemma C.11.** *With probability at least  $1 - \delta$ , the following inequality holds*

$$\sum_{k=1}^K \sum_{h=1}^H \mathbb{E}_{\mu^k, \mathcal{P}, \nu^k} [\beta_h^{r, k}(s_h, a_h, b_h) | s_1] \leq \widetilde{\mathcal{O}} \left( \sqrt{|\mathcal{S}| |\mathcal{A}| |\mathcal{B}| H^2 K} \right).$$

*Proof.* Since we have

$$\begin{aligned} &\sum_{k=1}^K \sum_{h=1}^H \mathbb{E}_{\mu^k, \mathcal{P}, \nu^k} [\beta_h^{r, k}(s_h, a_h, b_h) | s_1] \\ &= \sum_{k=1}^K \sum_{h=1}^H \mathbb{E}_{\mu^k, \mathcal{P}, \nu^k} \left[ C \sqrt{\frac{\log(|\mathcal{S}| |\mathcal{A}| |\mathcal{B}| HK / \delta)}{N_h^k(s, a, b)}} \right] \\ &= C \sqrt{\log \frac{|\mathcal{S}| |\mathcal{A}| |\mathcal{B}| HK}{\delta}} \sum_{k=1}^K \sum_{h=1}^H \mathbb{E}_{\mu^k, \mathcal{P}, \nu^k} \left[ \sqrt{\frac{1}{N_h^k(s, a, b)}} \right], \end{aligned}$$

then we can apply Lemma C.16 and obtain

$$\sum_{k=1}^K \sum_{h=1}^H \mathbb{E}_{\mu^k, \mathcal{P}, \nu^k} [\beta_h^{r, k}(s_h, a_h, b_h) | s_1] \leq \widetilde{\mathcal{O}} \left( \sqrt{|\mathcal{S}| |\mathcal{A}| |\mathcal{B}| H^2 K} \right),$$

with probability at least  $1 - \delta$ . Here  $\widetilde{\mathcal{O}}$  hides logarithm dependence on  $|\mathcal{S}|$ ,  $|\mathcal{A}|$ ,  $|\mathcal{B}|$ ,  $H$ ,  $K$ , and  $1/\delta$ . This completes the proof.  $\square$

### C.1. Other Supporting Lemmas

**Lemma C.12.** Let  $f : \Lambda \mapsto \mathbb{R}$  be a convex function, where  $\Lambda$  is the probability simplex defined as  $\Lambda := \{\mathbf{x} \in \mathbb{R}^d : \|\mathbf{x}\|_1 = 1 \text{ and } \mathbf{x}_i \geq 0, \forall i \in [d]\}$ . For any  $\alpha \geq 0$ ,  $\mathbf{z} \in \Lambda$ , and  $\mathbf{y} \in \Lambda^\circ$  where  $\Lambda^\circ \subset \Lambda$  with only relative interior points of  $\Lambda$ , supposing  $\mathbf{x}^{\text{opt}} = \operatorname{argmin}_{\mathbf{x} \in \Lambda} f(\mathbf{x}) + \alpha D_{\text{KL}}(\mathbf{x}, \mathbf{y})$ , then the following inequality holds

$$f(\mathbf{x}^{\text{opt}}) + \alpha D_{\text{KL}}(\mathbf{x}^{\text{opt}}, \mathbf{y}) \leq f(\mathbf{z}) + \alpha D_{\text{KL}}(\mathbf{z}, \mathbf{y}) - \alpha D_{\text{KL}}(\mathbf{z}, \mathbf{x}^{\text{opt}}).$$

This lemma is for mirror descent algorithms, whose proof can be found in existing works (Tseng, 2008; Nemirovski et al., 2009; Wei et al., 2019).

**Lemma C.13.** With probability at least  $1 - 4\delta'$ , the true transition model  $\mathcal{P}$  satisfies that for any  $k \in [K]$ ,

$$\mathcal{P} \in \Upsilon^k.$$

This lemma implies that the estimated transition model  $\widehat{\mathcal{P}}_h^k(s'|s, a)$  by (11) is closed to the true transition model  $\mathcal{P}_h(s'|s, a)$  with high probability. The upper bound for their difference is by empirical Bernstein's inequality and the union bound.

The next lemma is modified from Lemma 10 in Jin & Luo (2019).

**Lemma C.14.** We let  $w_h^k(s, a)$  denote the occupancy measure at the  $h$ -th step of the  $k$ -th episode under the true transition model  $\mathcal{P}$  and the current policy  $\mu^k$ . Then, with probability at least  $1 - 2\delta'$  we have for all  $h \in [H]$ , the following inequalities hold

$$\sum_{k=1}^K \sum_{s \in \mathcal{S}} \sum_{a \in \mathcal{A}} \frac{w_h^k(s, a)}{\max\{N_h^k(s, a), 1\}} = \mathcal{O}\left(|\mathcal{S}||\mathcal{A}| \log K + \log \frac{H}{\delta'}\right),$$

and

$$\sum_{k=1}^K \sum_{s \in \mathcal{S}} \sum_{a \in \mathcal{A}} \frac{w_h^k(s, a)}{\sqrt{\max\{N_h^k(s, a), 1\}}} = \mathcal{O}\left(\sqrt{|\mathcal{S}||\mathcal{A}|K} + |\mathcal{S}||\mathcal{A}| \log K + \log \frac{H}{\delta'}\right).$$

Furthermore, by Lemma C.13 and Lemma C.14, we give the following lemma to characterize the difference of two occupancy measures, which is modified from parts of the proof of Lemma 4 in Jin & Luo (2019).

**Lemma C.15.** Let  $w_h^k(s, a)$  be the occupancy measure at the  $h$ -th step of the  $k$ -th episode under the true transition model  $\mathcal{P}$  and the current policy  $\mu^k$ , and  $\tilde{w}_h^k(s, a)$  be the occupancy measure at the  $h$ -th step of the  $k$ -th episode under any transition model  $\tilde{\mathcal{P}}^k \in \Upsilon^k$  and the current policy  $\mu^k$  for any  $k$ . Then, with probability at least  $1 - 6\delta'$  we have for all  $h \in [H]$ , the following inequalities hold

$$\sum_{k=1}^K \sum_{h=1}^K \sum_{s \in \mathcal{S}} \sum_{a \in \mathcal{A}} |\tilde{w}_h^k(s, a) - w_h^k(s, a)| \leq \mathcal{E}_1 + \mathcal{E}_2,$$

where  $\mathcal{E}_1$  and  $\mathcal{E}_2$  are in the level of

$$\mathcal{E}_1 = \mathcal{O}\left[\sum_{h=2}^H \sum_{h'=1}^{h-1} \sum_{k=1}^K \sum_{s \in \mathcal{S}} \sum_{a \in \mathcal{A}} w_h^k(s, a) \left(\sqrt{\frac{|\mathcal{S}| \log(|\mathcal{S}||\mathcal{A}|HK/\delta')}{\max\{N_h^k(s, a), 1\}}} + \frac{\log(|\mathcal{S}||\mathcal{A}|HK/\delta')}{\max\{N_h^k(s, a), 1\}}\right)\right]$$

and

$$\mathcal{E}_2 = \mathcal{O}\left(\operatorname{poly}(H, |\mathcal{S}|, |\mathcal{A}|) \cdot \log \frac{|\mathcal{S}||\mathcal{A}|HK}{\delta'}\right),$$

where  $\operatorname{poly}(H, |\mathcal{S}|, |\mathcal{A}|)$  denotes the polynomial dependency on  $H, |\mathcal{S}|, |\mathcal{A}|$ .

**Lemma C.16.** With probability at least  $1 - \delta$ , the following inequality hold

$$\sum_{k=1}^K \sum_{h=1}^H \mathbb{E}_{\mu^k, \mathcal{P}, \nu^k} \left[ \sqrt{\frac{1}{\max\{N_h^k(s, a, b), 1\}}} \right] \leq \tilde{\mathcal{O}}\left(\sqrt{|\mathcal{S}||\mathcal{A}||\mathcal{B}|H^2K} + |\mathcal{S}||\mathcal{A}||\mathcal{B}|H\right),$$

where  $\tilde{\mathcal{O}}$  hides logarithm terms.

*Proof.* The zero-sum Markov game with single controller in this paper can be interpreted as a regular MDP learning problem with policies  $w_h^k(a, b | s) = \mu_h^k(a | s) \nu_h^k(b | s)$  and a transition model  $\mathcal{P}_h(s' | s, a, b) = \mathcal{P}_h(s' | s, a)$  with a joint action  $(a, b)$  in the action space of size  $|\mathcal{A}||\mathcal{B}|$ . Thus, we apply Lemma 19 of Efroni et al. (2020), which extends lemmas in Zanette & Brunskill (2019); Efroni et al. (2019) to MDP with non-stationary dynamics by adding a factor of  $H$ , to obtain our lemma. This completes the proof.  $\square$
